# Supplementary material
Source: PubMed Central journal article supplement (PMC4489319)

**Supporting Information for**

**Unraveling cholesterol catabolism in *Mycobacterium tuberculosis*: the ChsE4-ChsE5  $\alpha_2\beta_2$  acyl-CoA dehydrogenase initiates  $\beta$ -oxidation of 3-oxo-cholest-4-en-26-oyl CoA**

Meng Yang,<sup>1</sup> Rui Lu,<sup>1</sup> Kip E. Guja,<sup>2</sup> Matthew F. Wipperman,<sup>1</sup> Johnna R. St. Clair,<sup>3</sup> Amber C. Bonds,<sup>2</sup> Miguel Garcia-Diaz,<sup>2</sup> and Nicole S. Sampson<sup>1,\*</sup>

<sup>1</sup>Department of Chemistry, Stony Brook University, Stony Brook, NY 11794-3400

<sup>2</sup>Department of Pharmacological Sciences, Stony Brook University, Stony Brook, NY 11794-8651

<sup>3</sup>Biochemistry and Structural Biology Graduate Program, Stony Brook University, Stony Brook, NY 11794-5215

## Table of Contents

|                                                                                                                                                                                                             |         |
|-------------------------------------------------------------------------------------------------------------------------------------------------------------------------------------------------------------|---------|
| Table S1. Gene constructs used in this study.....                                                                                                                                                           | S3      |
| Figure S1. Analytical ultracentrifugation (AUC) sedimentation equilibrium analysis .....                                                                                                                    | S4      |
| Figure S2. Purification of the ChsE4 <sub>E247A</sub> -ChsE5 mutant and its catalytic activity with 3-OCS-CoA; analysis of product formation catalyzed by ChsE4-ChsE5 with 3-OCS-CoA as the substrate ..... | S5      |
| Figure S3. The dehydrogenation of 3-OCO-CoA.....                                                                                                                                                            | S6      |
| Figure S4. Small Angle X-ray Scattering (SAXS) generates a tetrameric envelope for solution state ChsE4-ChsE5.....                                                                                          | S7      |
| Figure S5. The FAD cofactor is reduced upon X-ray irradiation .....                                                                                                                                         | S8      |
| Figure S6. The three acyl-CoA dehydrogenase (ACAD) domains of ChsE4 and ChsE5 .....                                                                                                                         | S9      |
| <sup>1</sup> H, <sup>13</sup> C NMR spectra of compounds <b>3, 4, 5, 6, 7, 8, 9, 10, 11</b> .....                                                                                                           | S10-S27 |

**Table S1.** Gene constructs used in this study.

| construct                      | vector        | gene                 | gene name          | <i>His</i> <sub>6</sub> tag | selection  | source or ref    |
|--------------------------------|---------------|----------------------|--------------------|-----------------------------|------------|------------------|
| <i>p26N/27</i>                 | <i>pET28b</i> | <i>Rv3504/Rv3505</i> | <i>ChsE4/ChsE5</i> | <i>N-terminal</i>           | <i>Kan</i> | <sup>1</sup>     |
| <i>p26N</i>                    | <i>pET28b</i> | <i>Rv3504</i>        | <i>ChsE4</i>       | <i>N-terminal</i>           | <i>Kan</i> | <i>This work</i> |
| <i>p27</i>                     | <i>pET20b</i> | <i>Rv3505</i>        | <i>ChsE5</i>       | <i>no tag</i>               | <i>Amp</i> | <i>This work</i> |
| <i>p34N</i>                    | <i>pET28b</i> | <i>Rv3573c</i>       | <i>ChsE3</i>       | <i>N-terminal</i>           | <i>Kan</i> | <i>This work</i> |
| <i>p26N<sub>E247A</sub>/27</i> | <i>pET28b</i> | <i>Rv3504/Rv3505</i> | <i>ChsE4/ChsE5</i> | <i>N-terminal</i>           | <i>Kan</i> | <i>This work</i> |

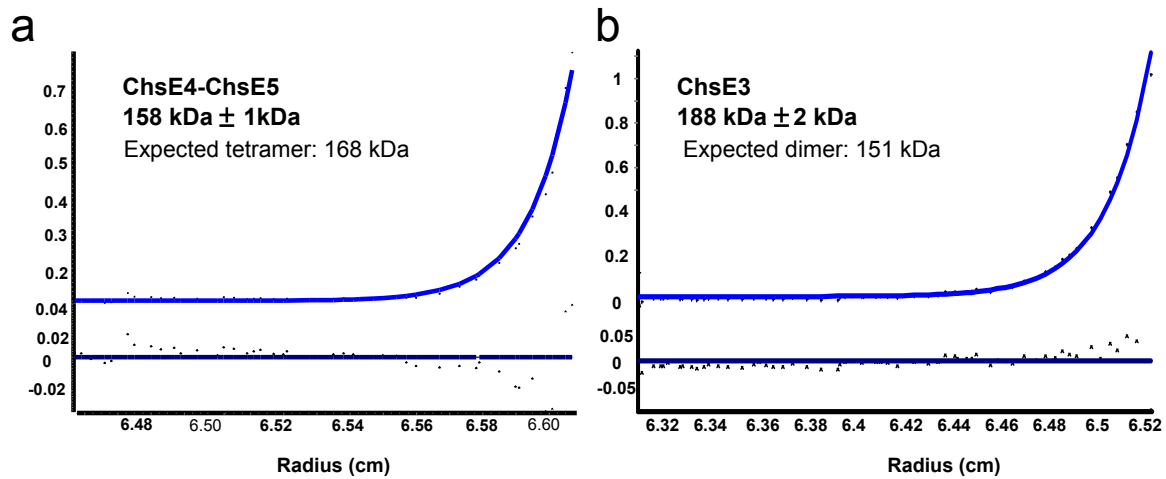

**Figure S1. Analytical ultracentrifugation (AUC) sedimentation equilibrium analysis.** (a) ChsE4-ChsE5 (5.18  $\mu\text{M}$ , 2.28  $\mu\text{M}$ , and 1.08  $\mu\text{M}$ ) and (b) ChsE3 (6.09  $\mu\text{M}$ , 3.05  $\mu\text{M}$ , and 1.52  $\mu\text{M}$ ) were centrifuged at speeds of 20k, 25k, and 30k rpm at 20° C in an analytical ultracentrifuge. The solid line (*light blue*) shows the fit of the data to the ideal species model and the residuals of the fit are graphed below the fit (*dark blue*). The best global fit for each protein is shown. Experimentally determined molecular weights are shown for each sample.

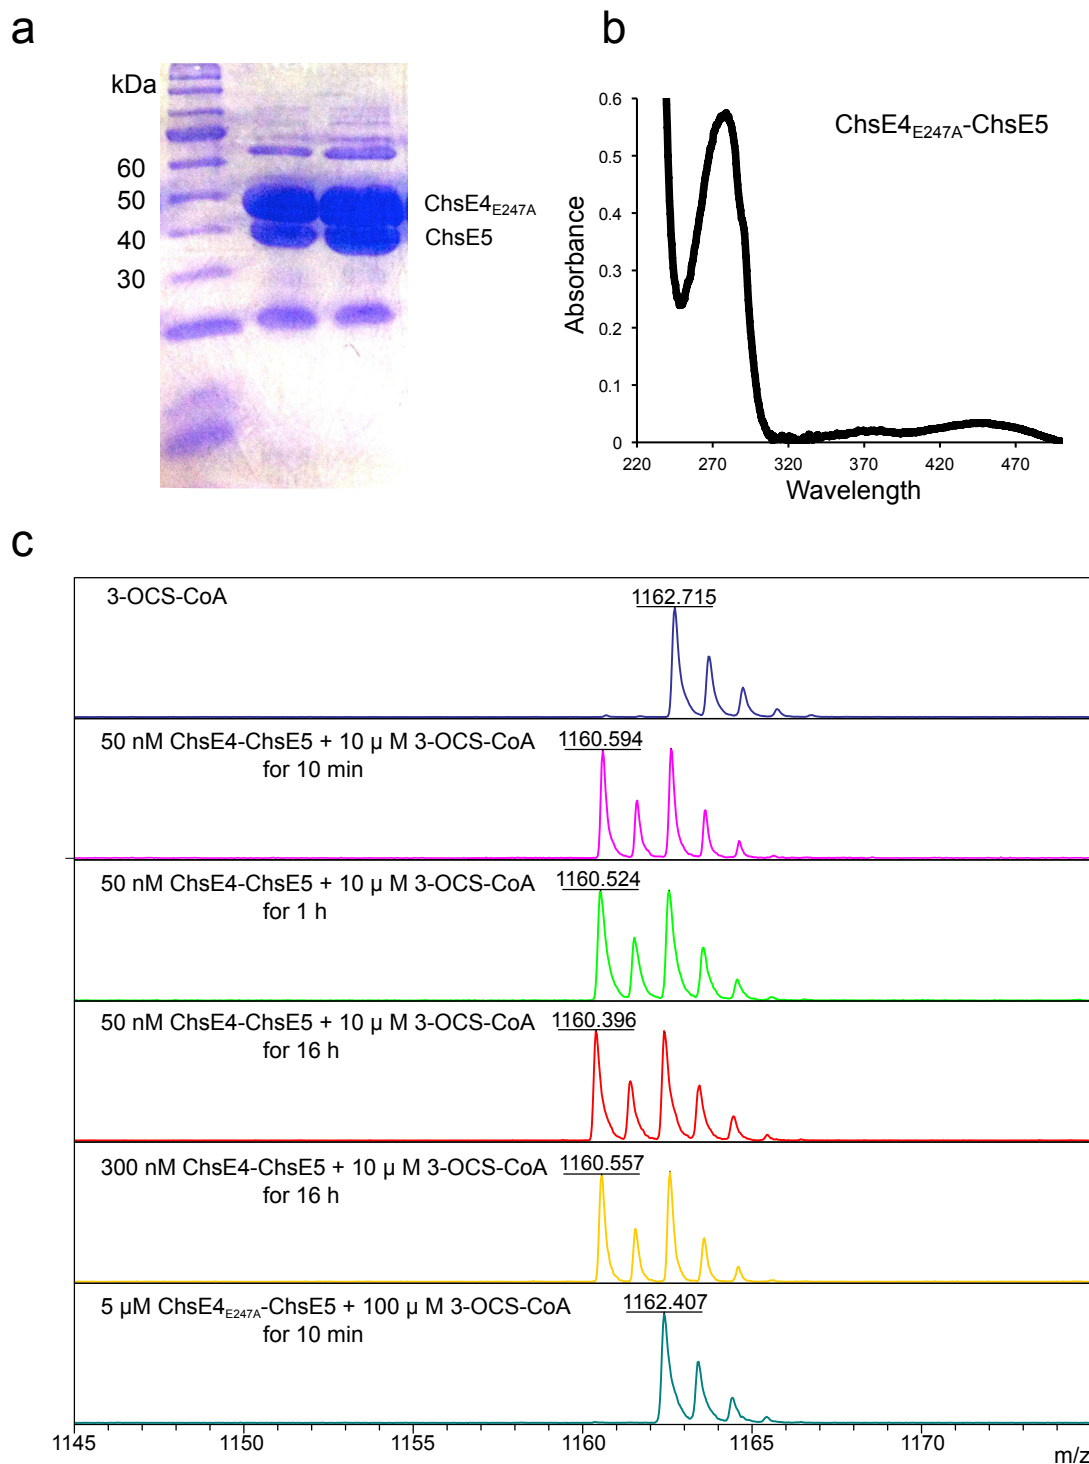

**Figure S2. Purification of the ChsE4<sub>E247A</sub>-ChsE5 mutant and its catalytic activity with 3-OCS-CoA; analysis of product formation catalyzed by ChsE4-ChsE5 with 3-OCS-CoA as the substrate.** (a) SDS-PAGE gel analysis of the purified ChsE4<sub>E247A</sub>-ChsE5 (b) The UV-visible spectrum of the purified ChsE4<sub>E247A</sub>-ChsE5 showing the characteristic FAD absorbance. (c) Analysis of the product formation of ChsE4-ChsE5 with 3-OCS-CoA diastereomers as a function of time and increased enzyme concentration. The spectra revealed that the percent substrate conversion remained fixed at a 1:1 ratio of product to substrate.

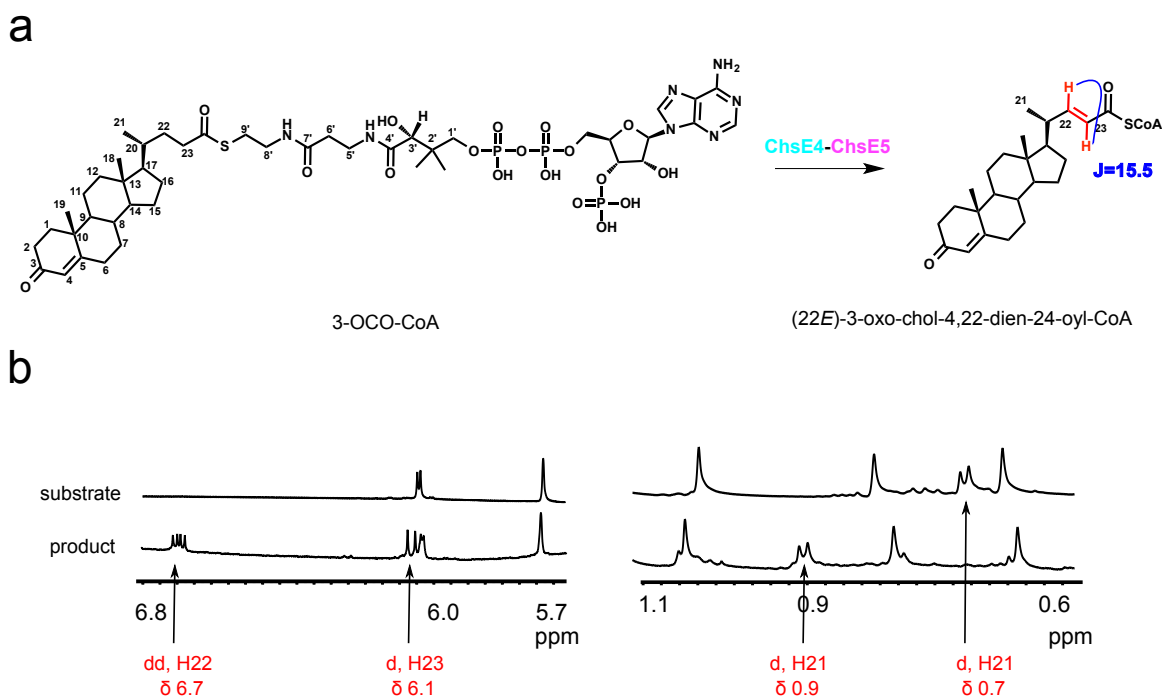

**Figure S3. The dehydrogenation of 3-OCO-CoA.** (a) ChsE4-ChsE5 catalyzes the formation of (22*E*)-3-oxo-cholesterol-4,22-dien-24-oyl-CoA, (b) as determined by the observed chemical shift and coupling constant. The C22 and C23 olefinic protons appear at 6.7 and 6.1 ppm as doublets in the product spectrum (panel b, left), and the double bond induces a downfield shift of the C20 proton and C21 methyl proton resonances (panel b, right).

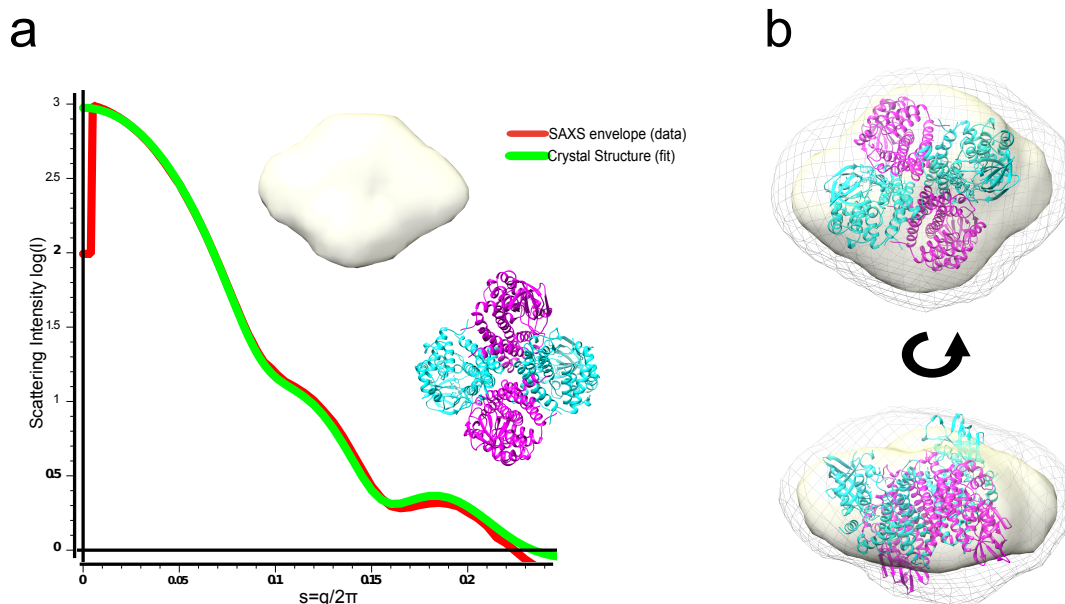

**Figure S4. Small Angle X-ray Scattering (SAXS) generates a tetrameric envelope for solution state ChsE4-ChsE5.** Small-angle X-ray scattering was used to determine the envelope of the solution state ChsE4-ChsE5 protein complex. (a) The theoretical scattering profile of the ChsE4-ChsE5 crystal structure, defined as scattering intensity ( $I$ ), versus scattering vector ( $s$ ) was calculated with CRY SOL and fit to the experimentally determined scattering profile for ChsE4-ChsE5 in solution, and the Chi-value (the square root of Chi squared) is 2.8. (b) The molecular envelope of solution state ChsE4-ChsE5 was determined from the experimental scattering profile using the ASTAS package. Then the high-resolution crystal structure was subsequently docked into the molecular envelope in Chimera, and the correlation coefficient is 0.90.

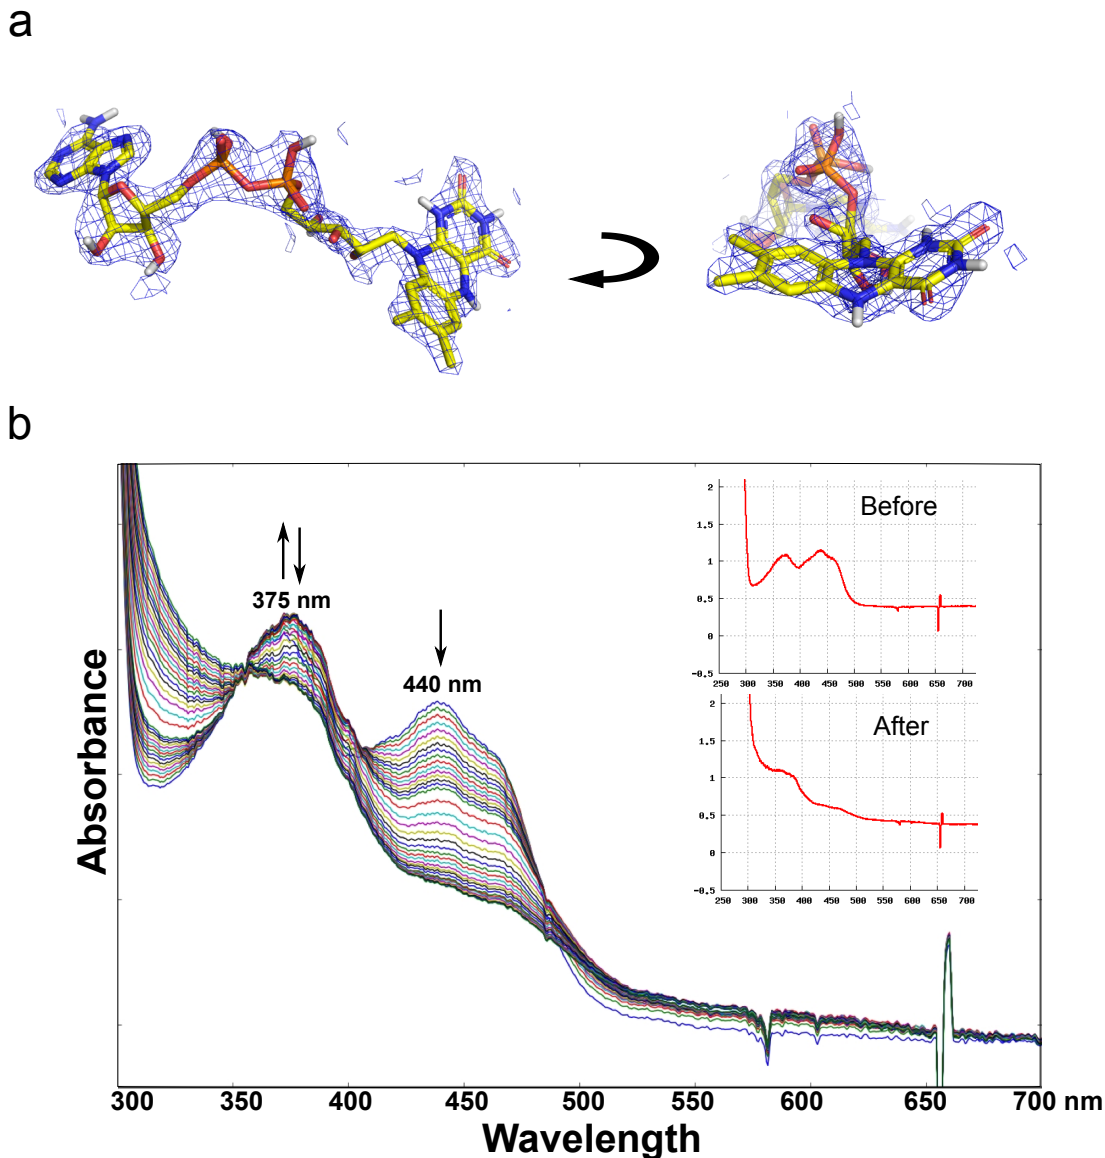

**Figure S5. The FAD cofactor is reduced upon X-ray irradiation.** To investigate the potential reduction of FAD cofactor during our X-ray diffraction data collection, we collected a full dataset of X-ray diffraction with simultaneous optical spectroscopy as a function of X-ray exposure on beamline X26-C of the NSLS. The optical absorption spectra were collected during the readout of each X-ray diffraction image and an overlay of spectra during the diffraction data collection was constructed. (a) A simulated annealing *Fo-Fc* omit map for the bound cofactor was calculated to reduce the effects of model bias. The electron density was contoured at  $2.5 \sigma$  and displayed as blue mesh. The polar hydrogens are shown to clearly represent the oxidation state, but they are not present in the deposited coordinates. (b) Correlated absorption spectroscopy data for the ChsE4-ChsE5 crystal were collected as a function of X-ray exposure. The spectra were overlaid and the changes at 440 nm and 375 nm are shown. Inset. two spectra, one at the beginning and one at the end of X-ray exposure, were selected to highlight the change in absorbance.



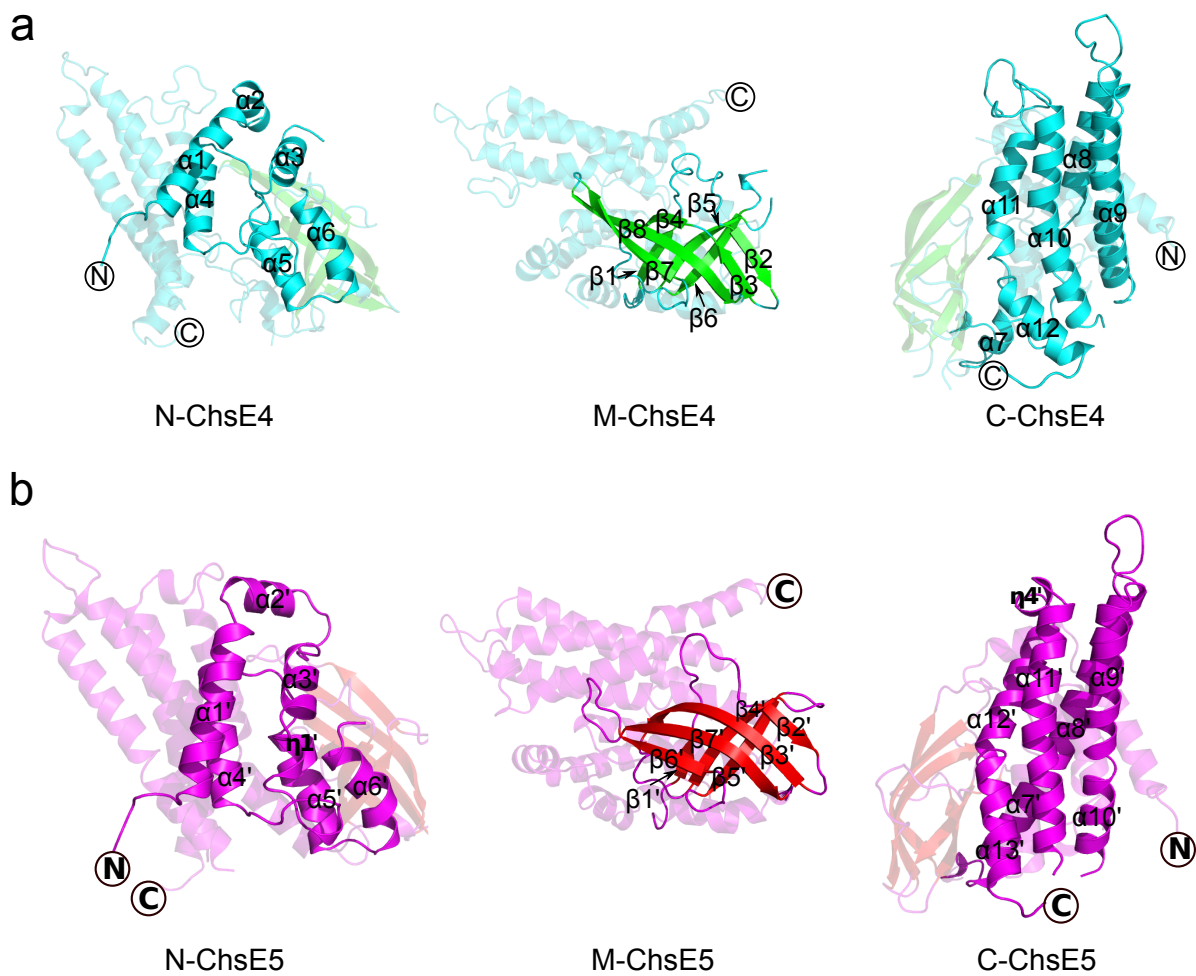

**Figure S6. The three acyl-CoA dehydrogenase (ACAD) domains of ChsE4 and ChsE5.** (a) ChsE4 and (b) ChsE5 both possess three ACAD domains: N-terminal domain (N-ChsE4; N-ChsE5), Middle domain (M-ChsE4; M-ChsE5), and C-terminal domain (C-ChsE5; C-ChsE5).

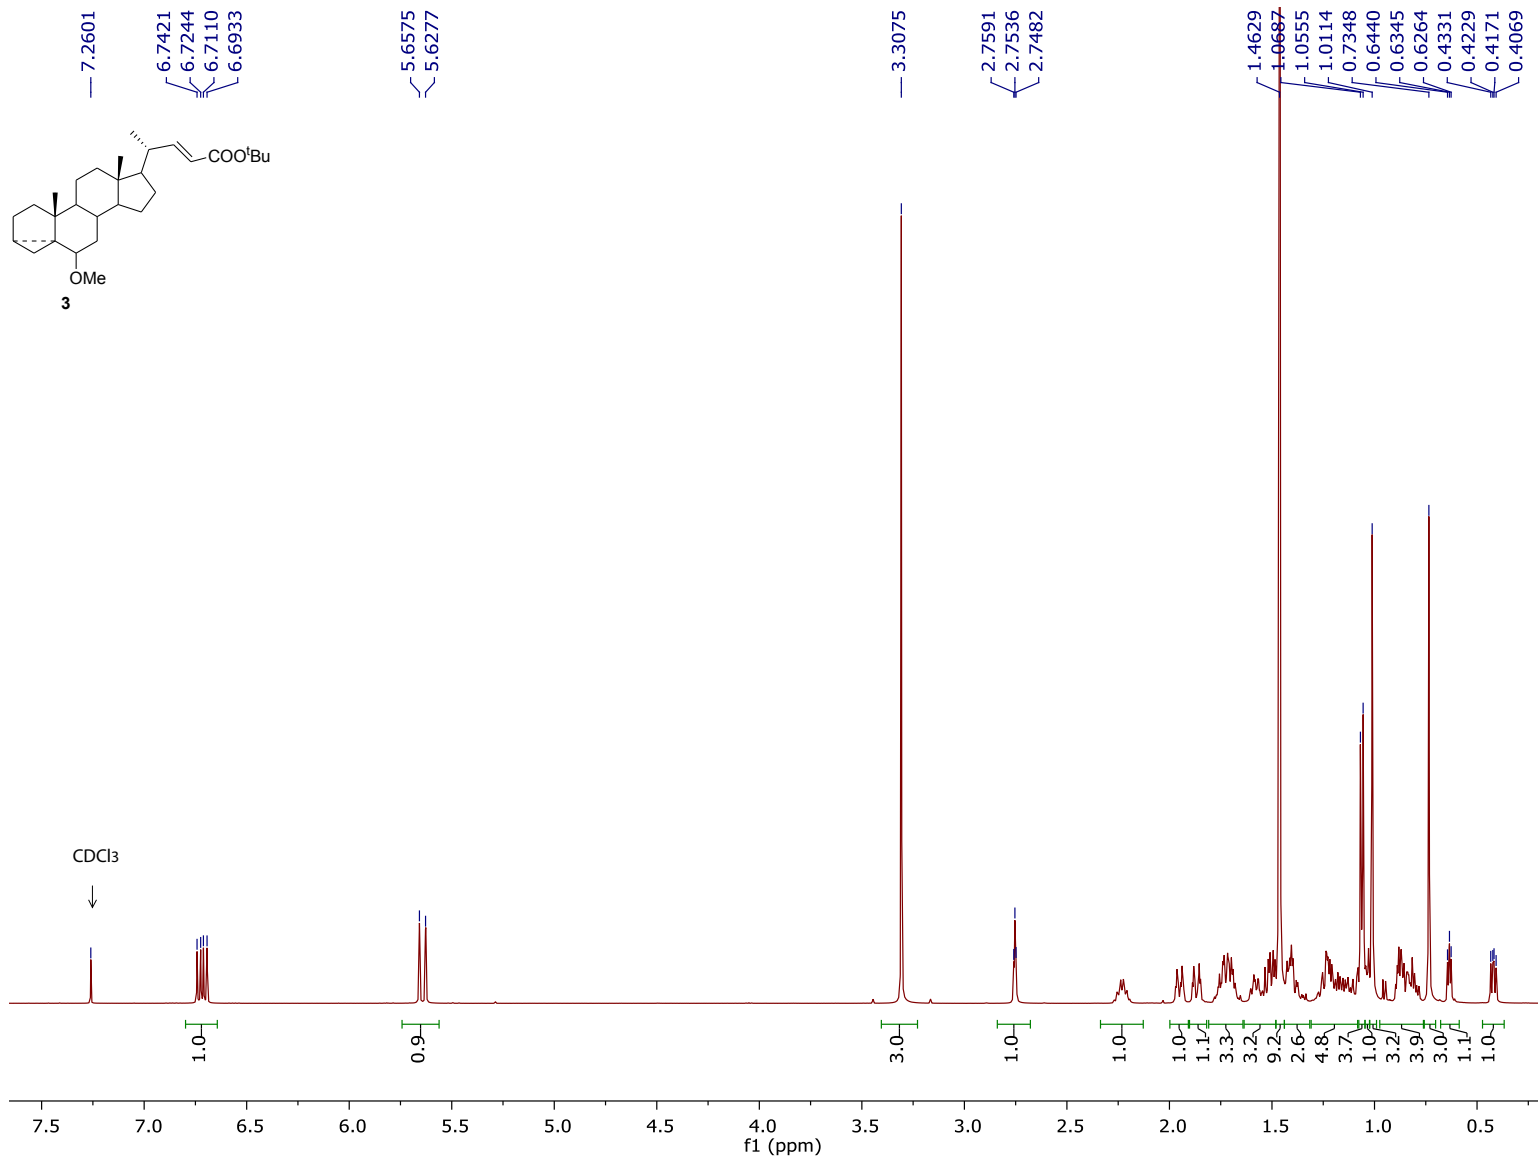

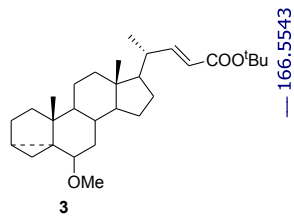

— 166.5543

— 153.5920

— 120.5637

82.3608  
79.9016  
77.2954  
77.0413  
76.7870

56.5812  
56.3349  
55.1435  
48.0278  
43.4017  
43.0994  
40.1260  
39.6103  
35.2920  
35.0290  
30.5125  
28.3014  
28.2020  
24.9716  
24.1987  
22.7545  
21.5138  
19.3109  
19.2404  
13.0926  
12.4712

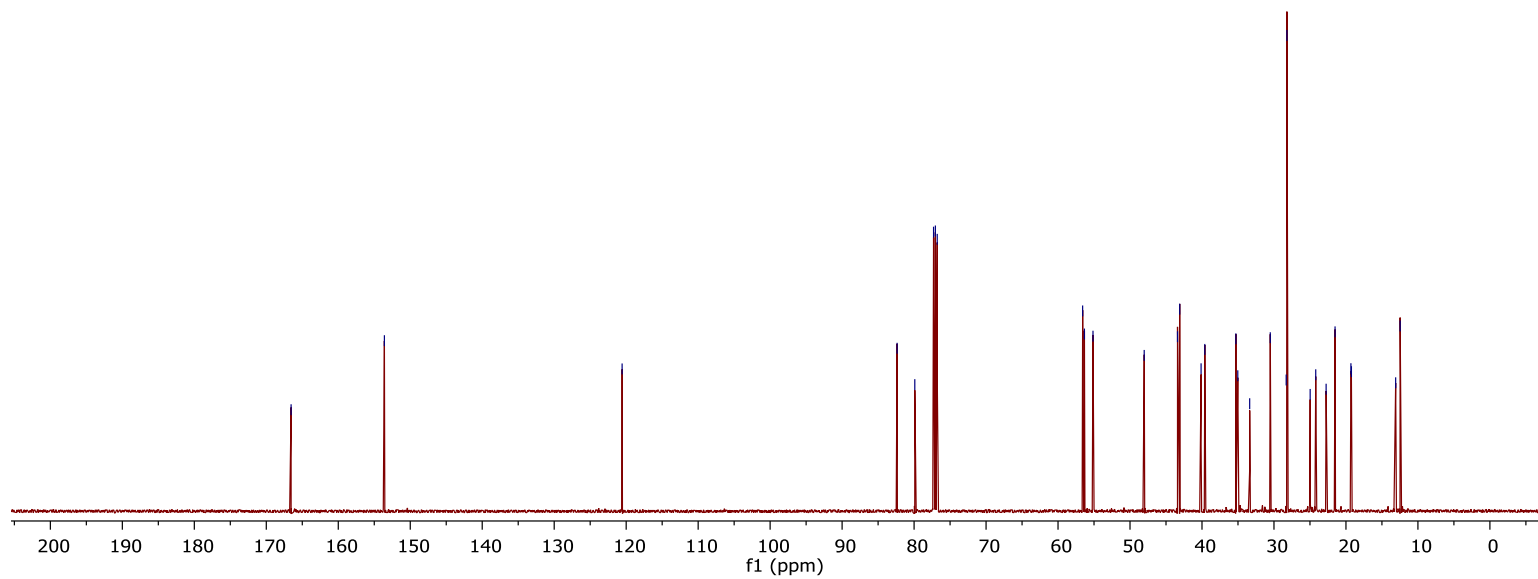

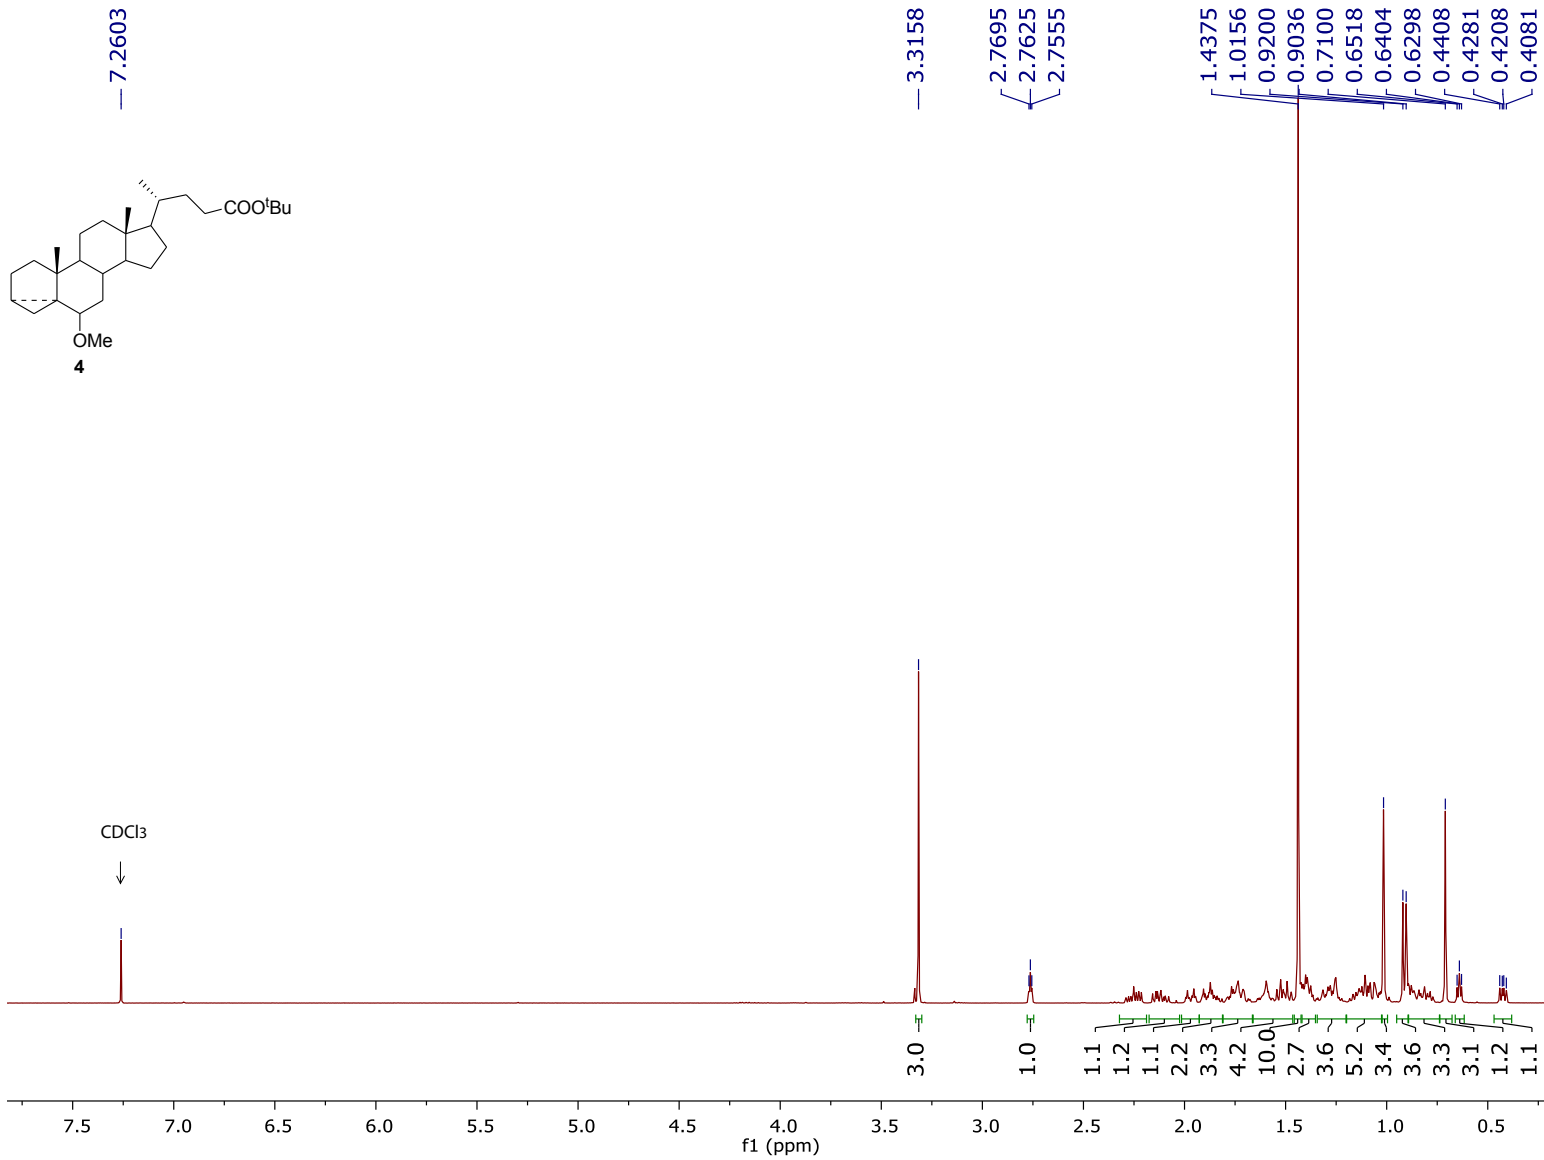

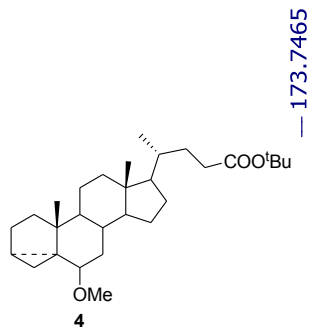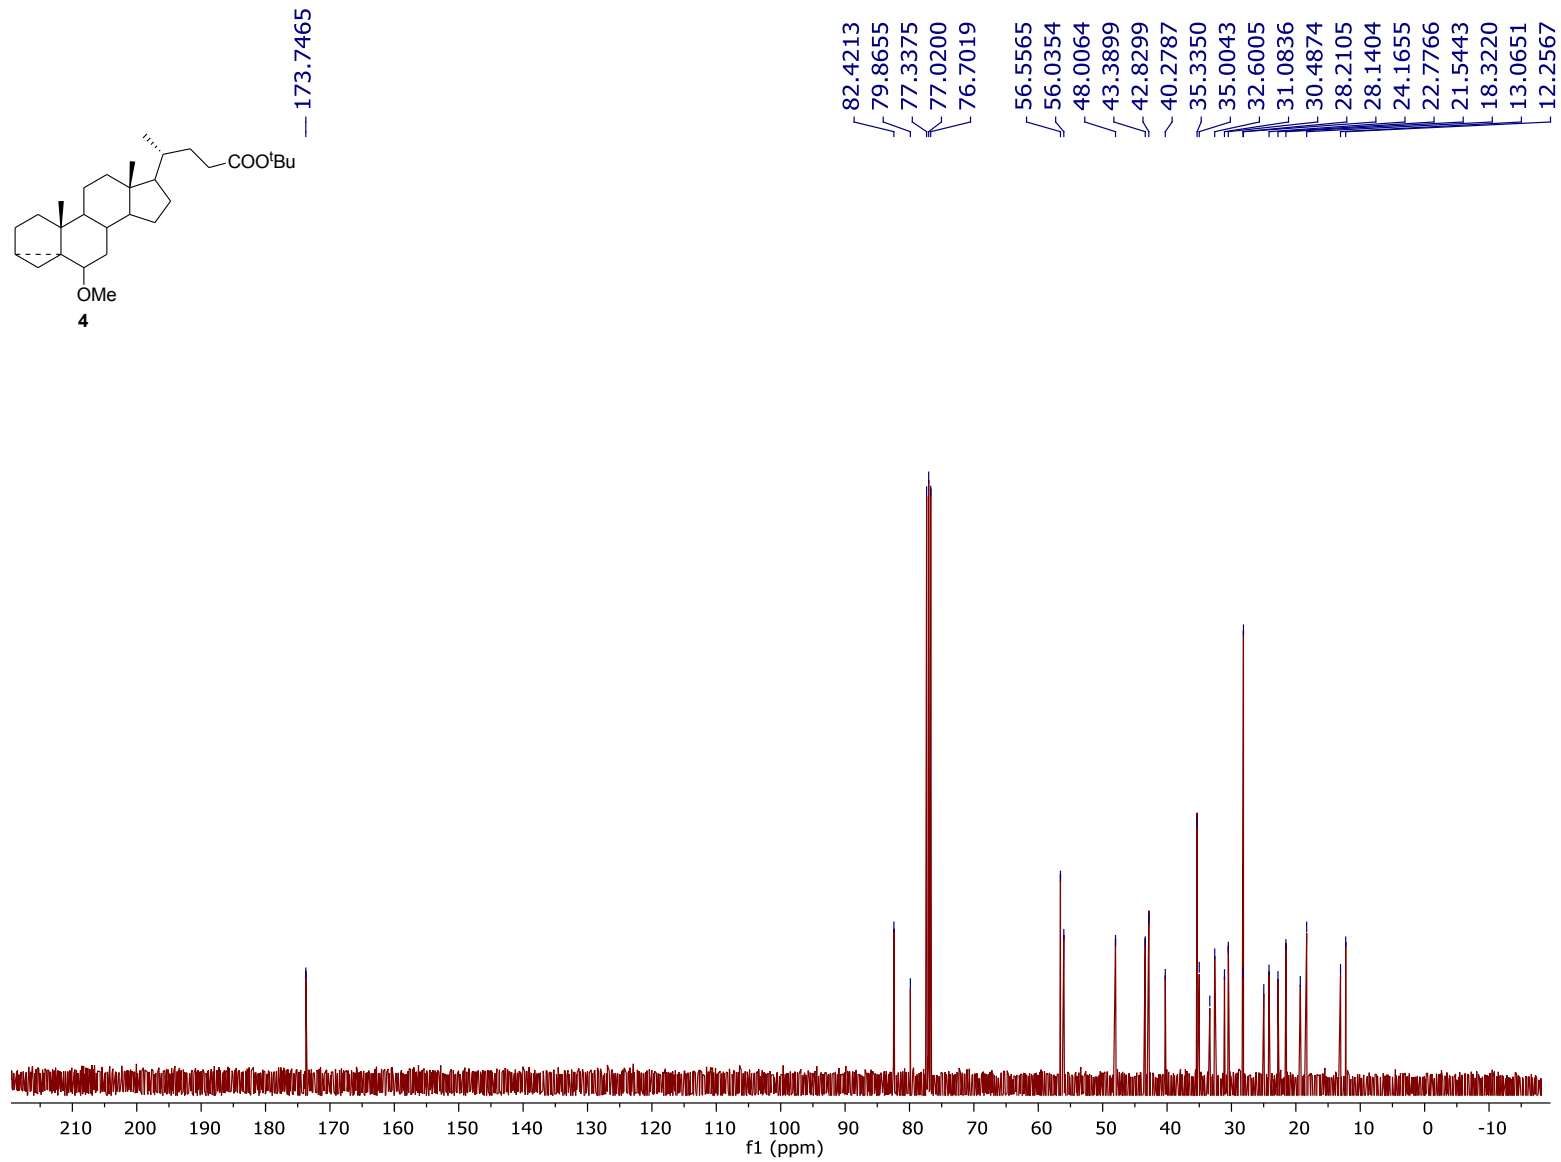

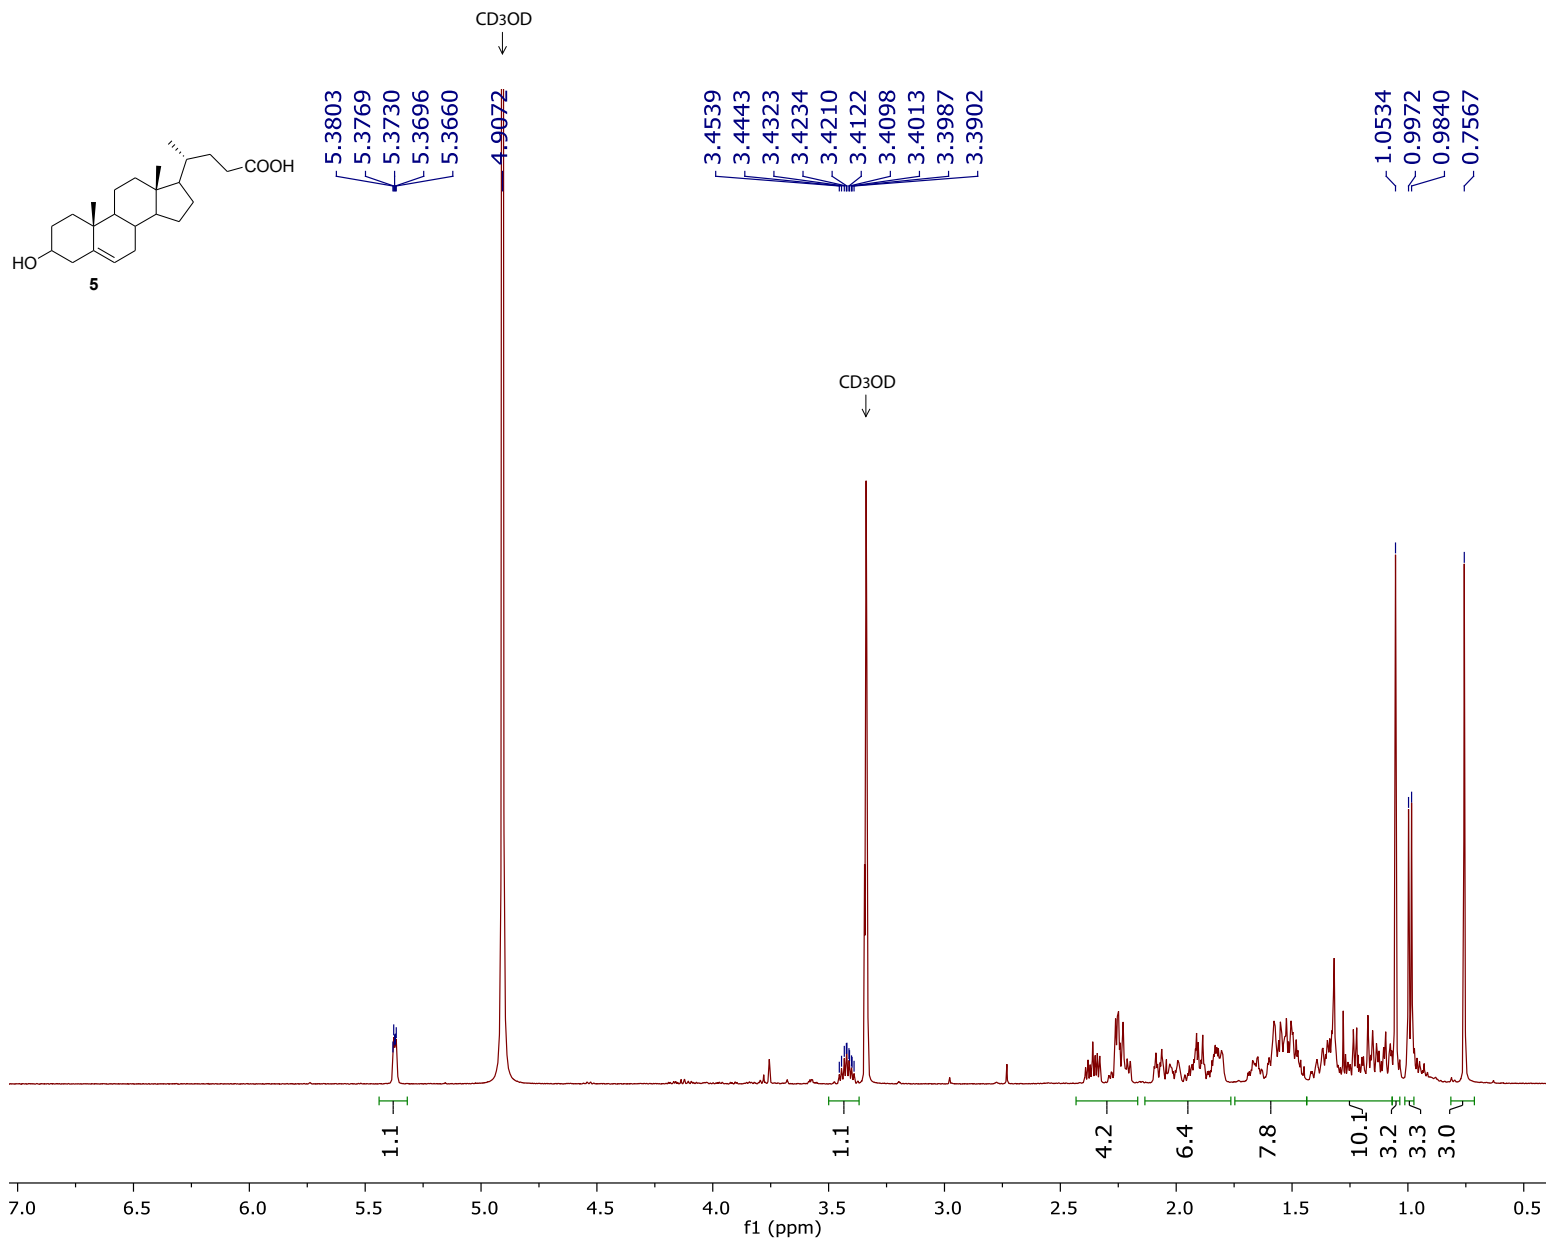

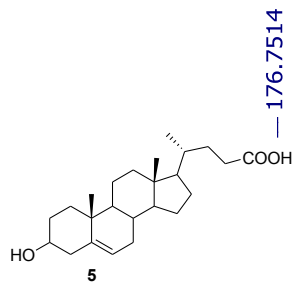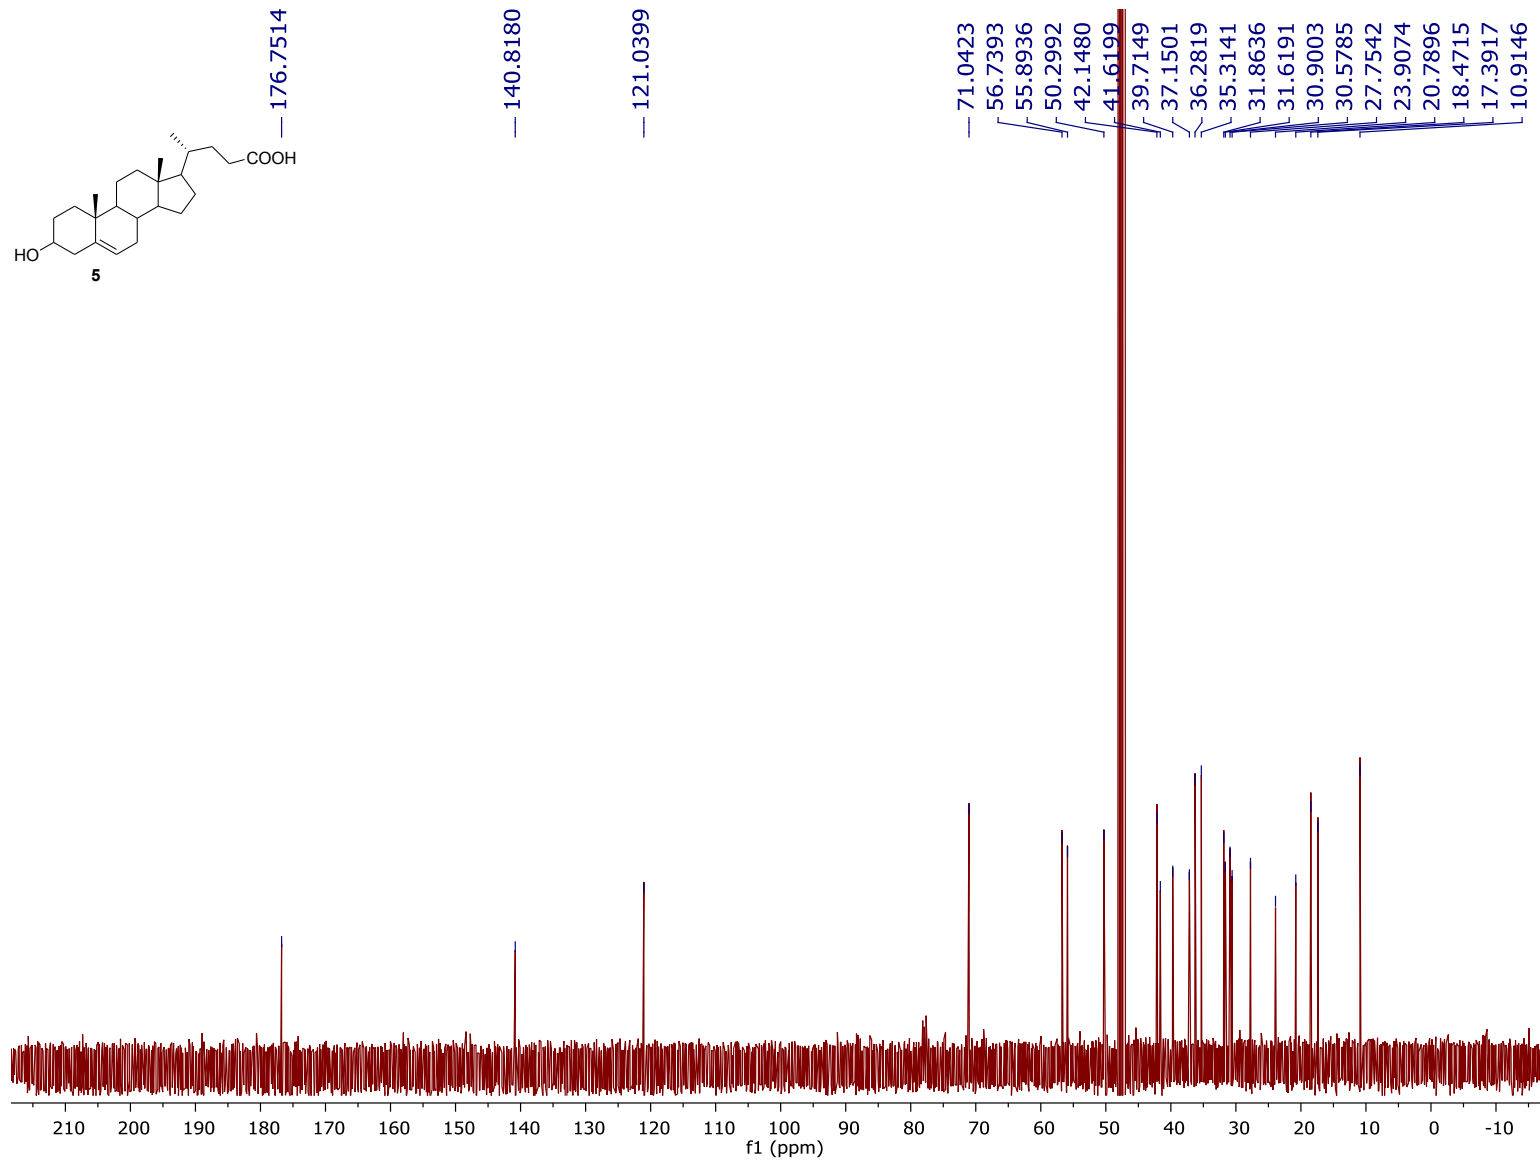

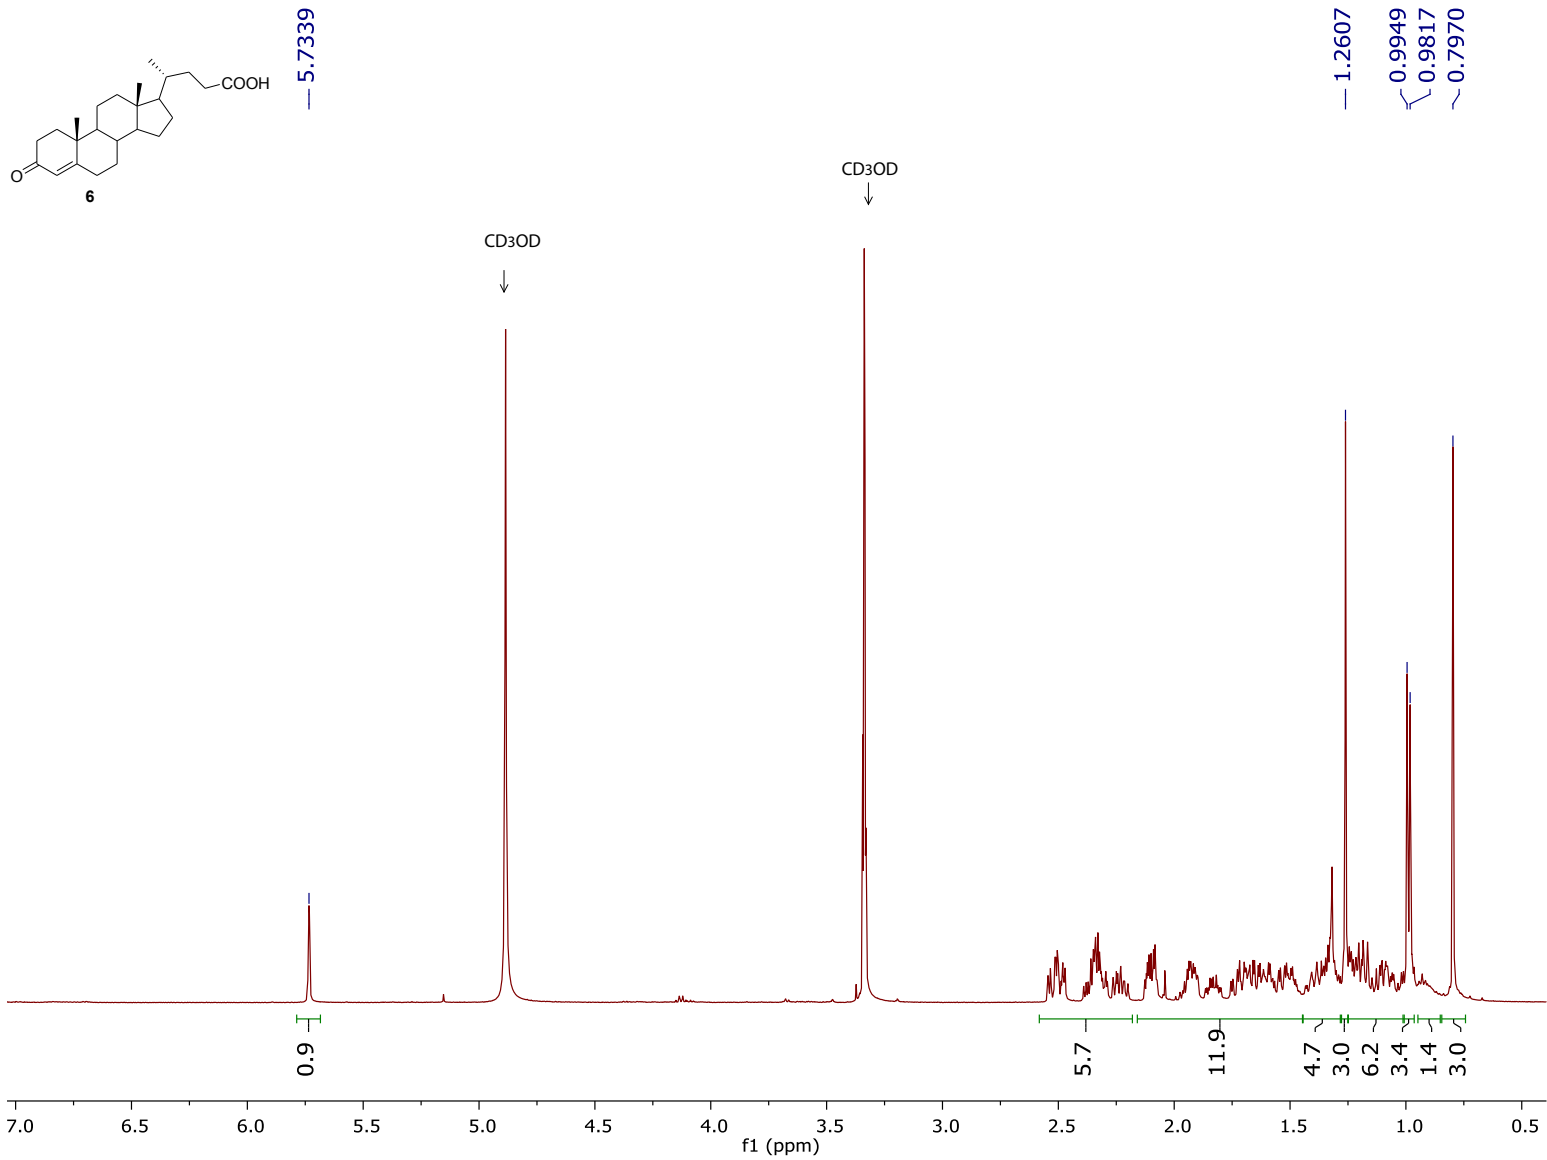



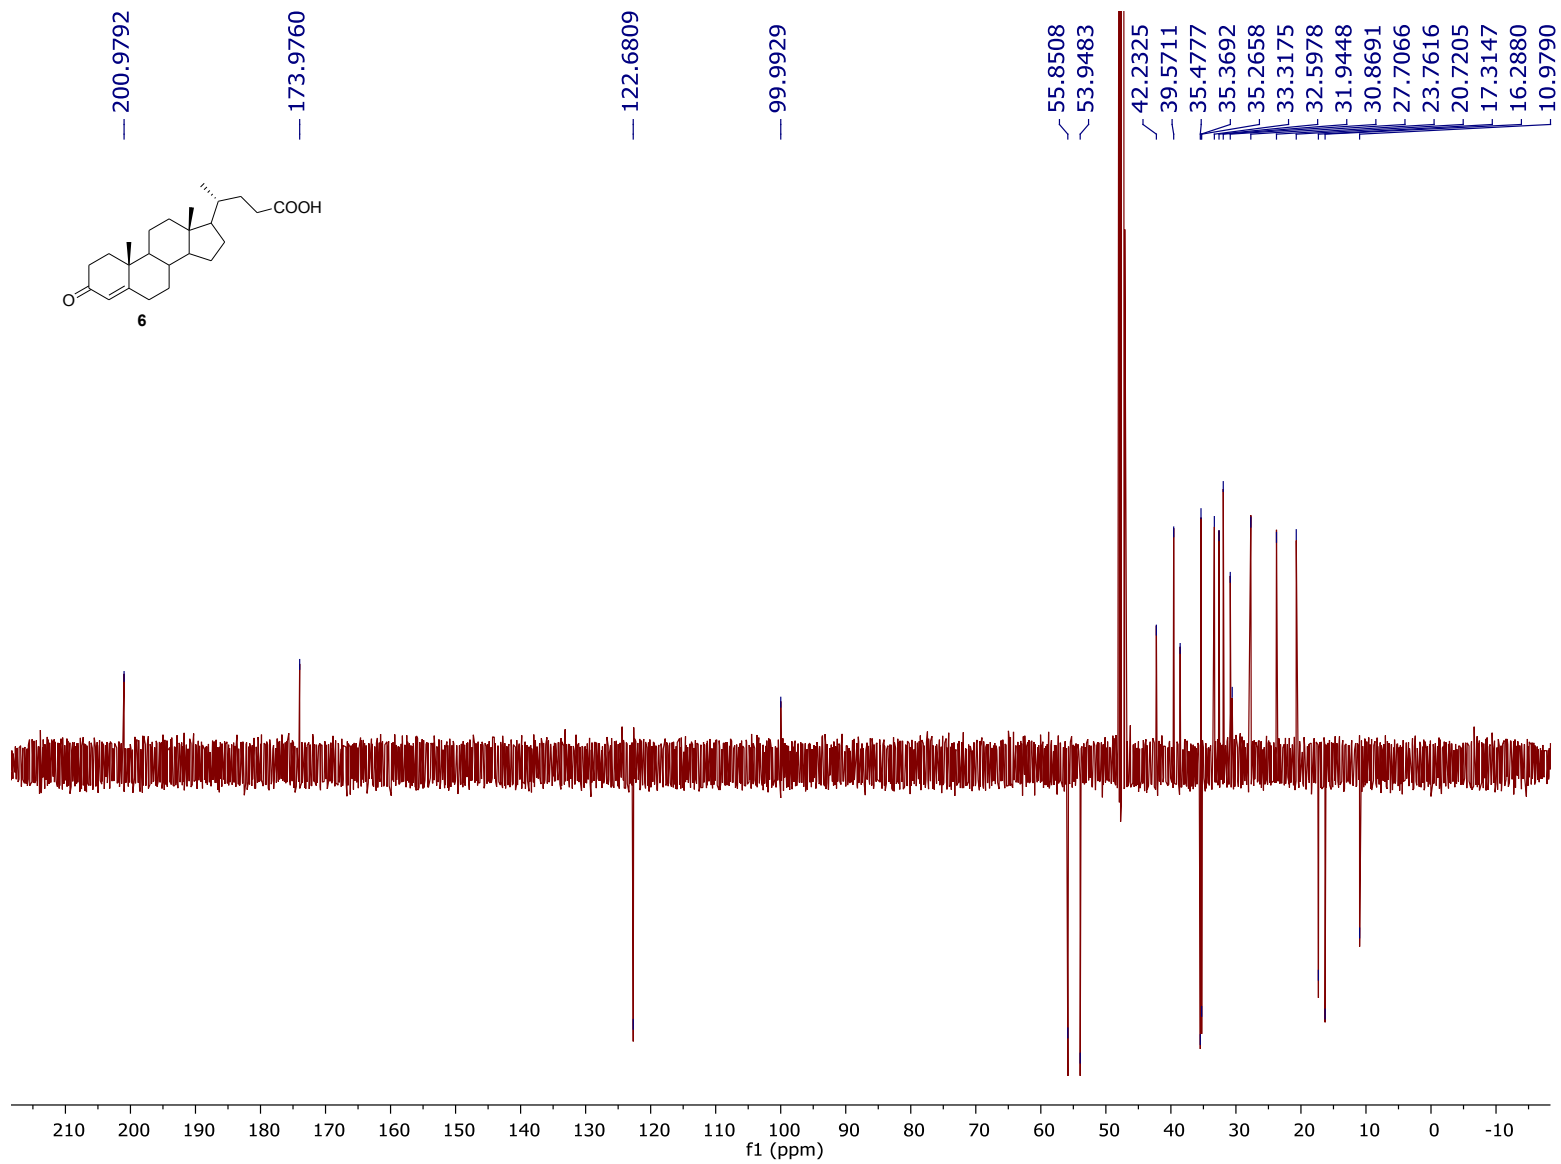

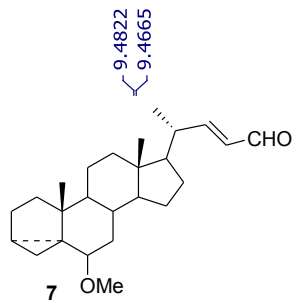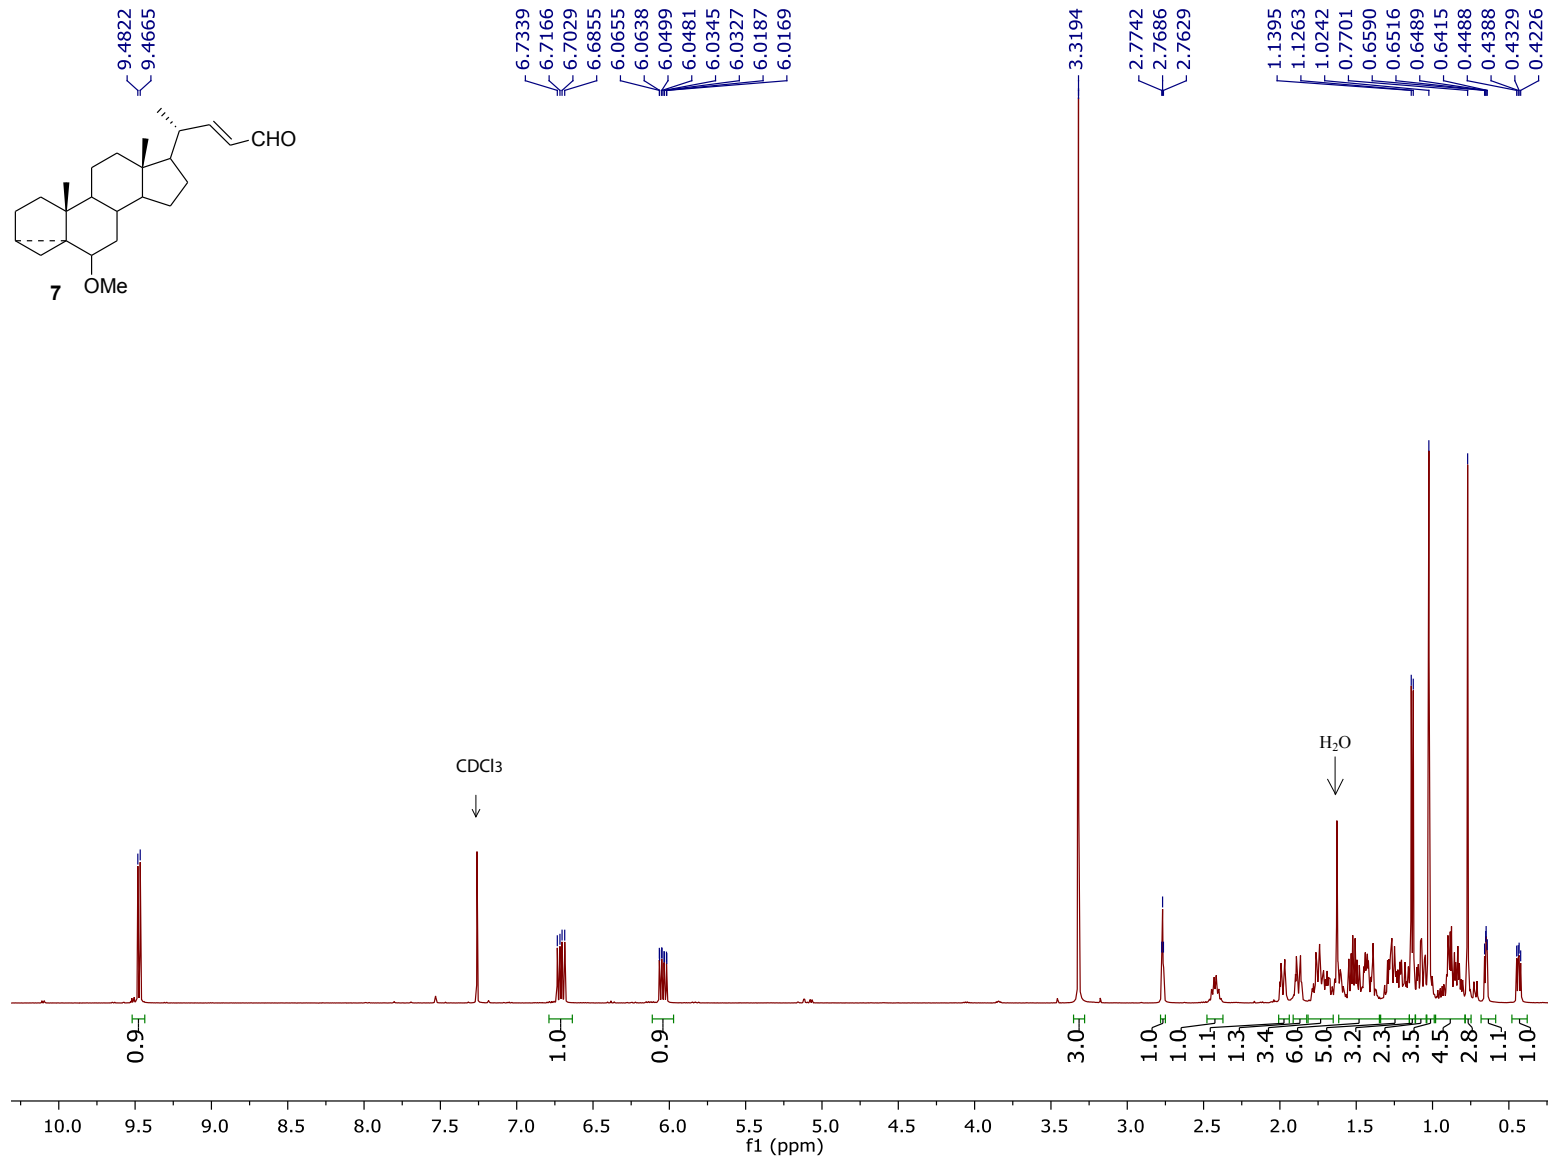

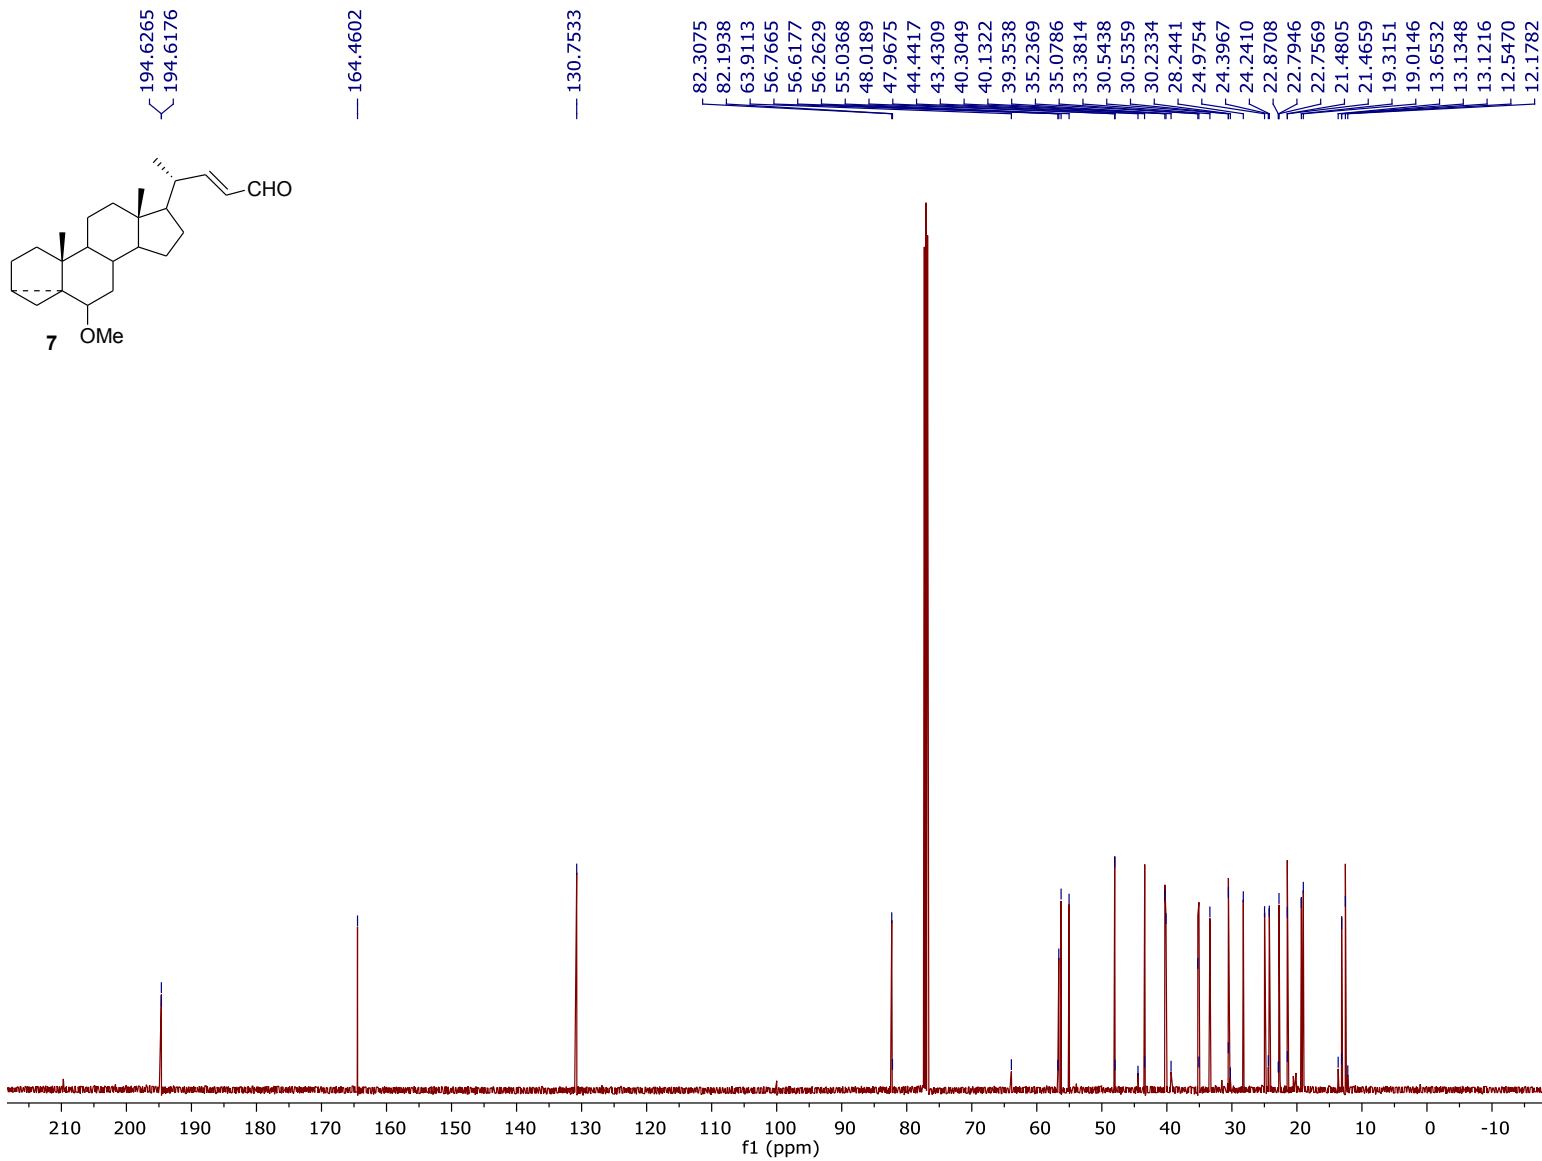

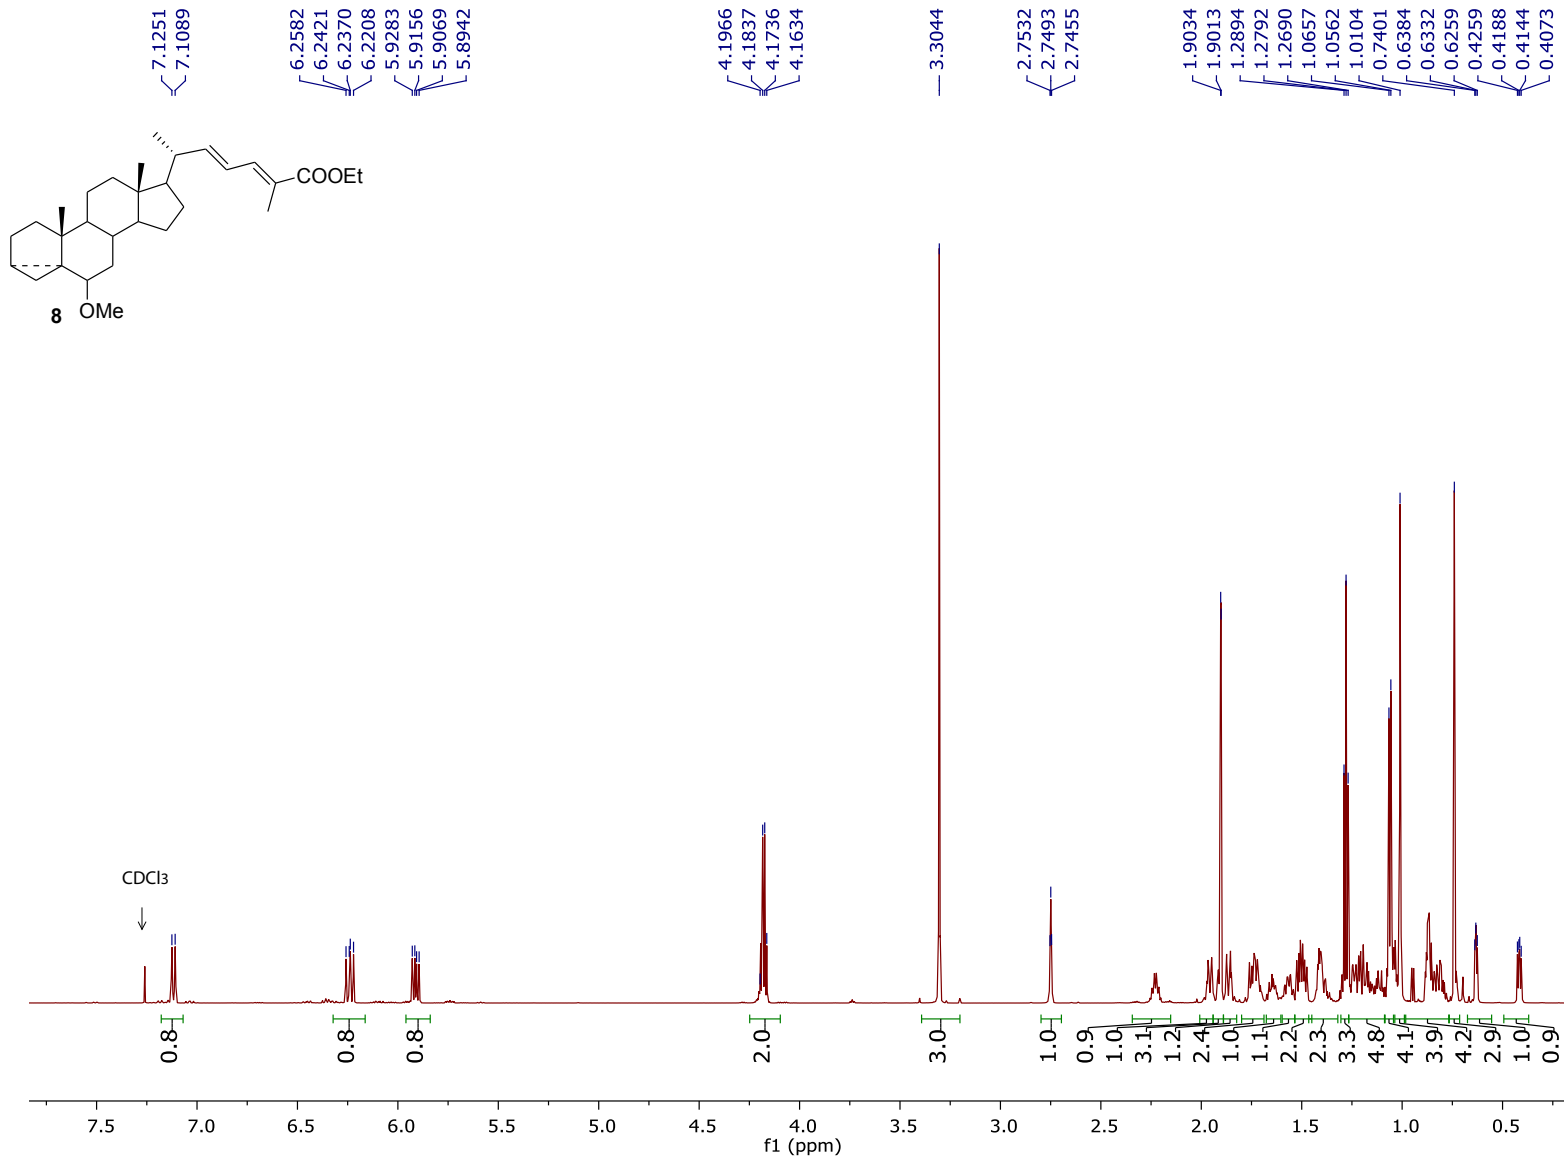

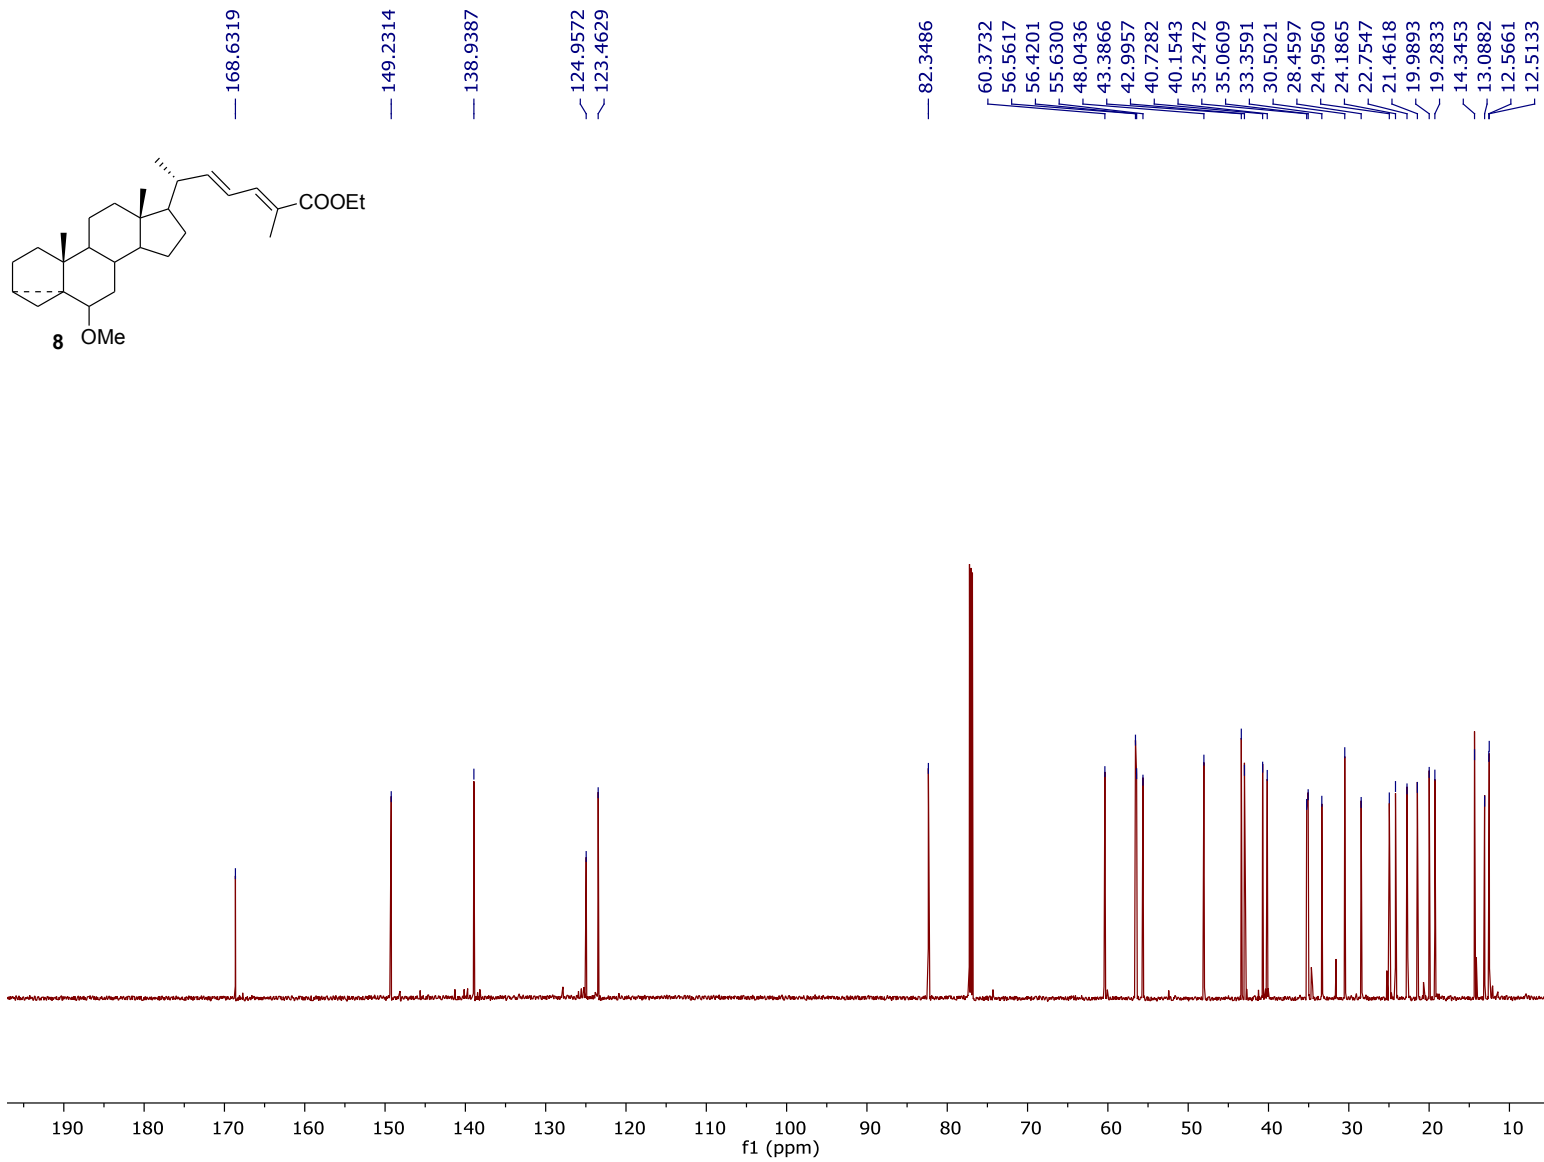

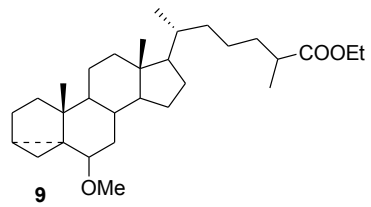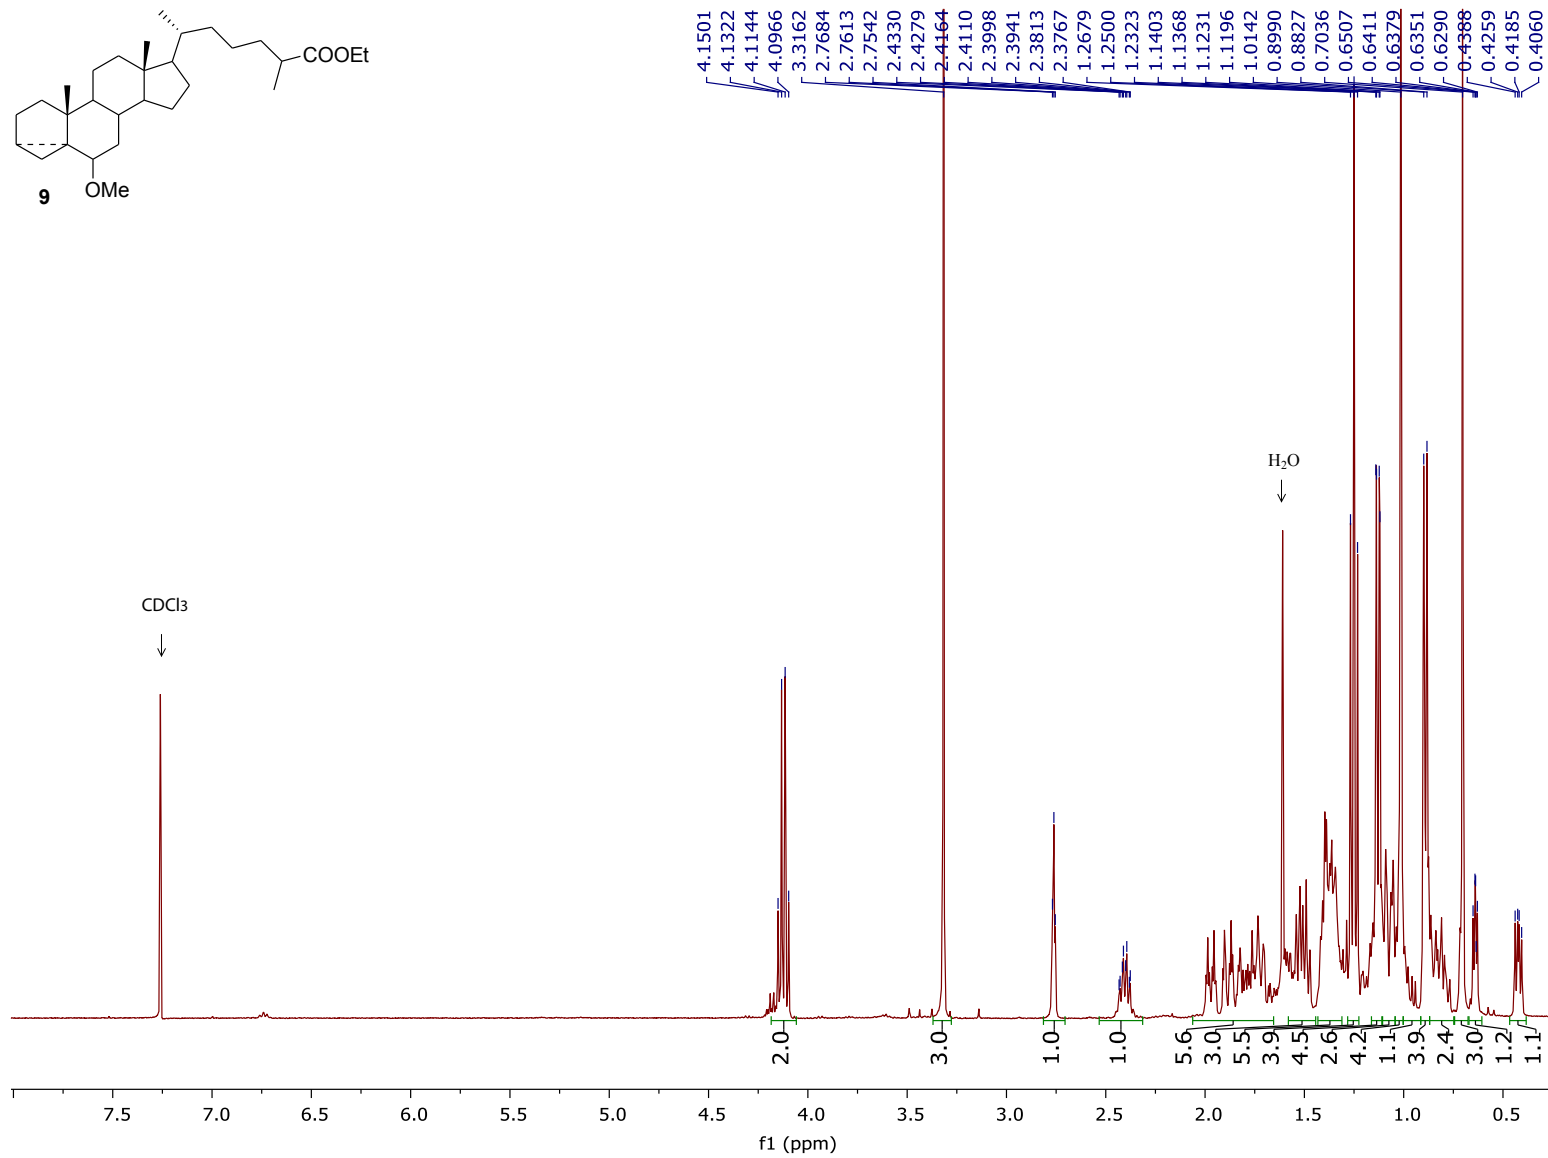

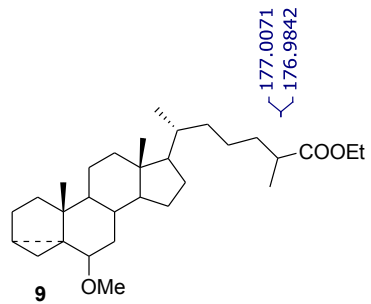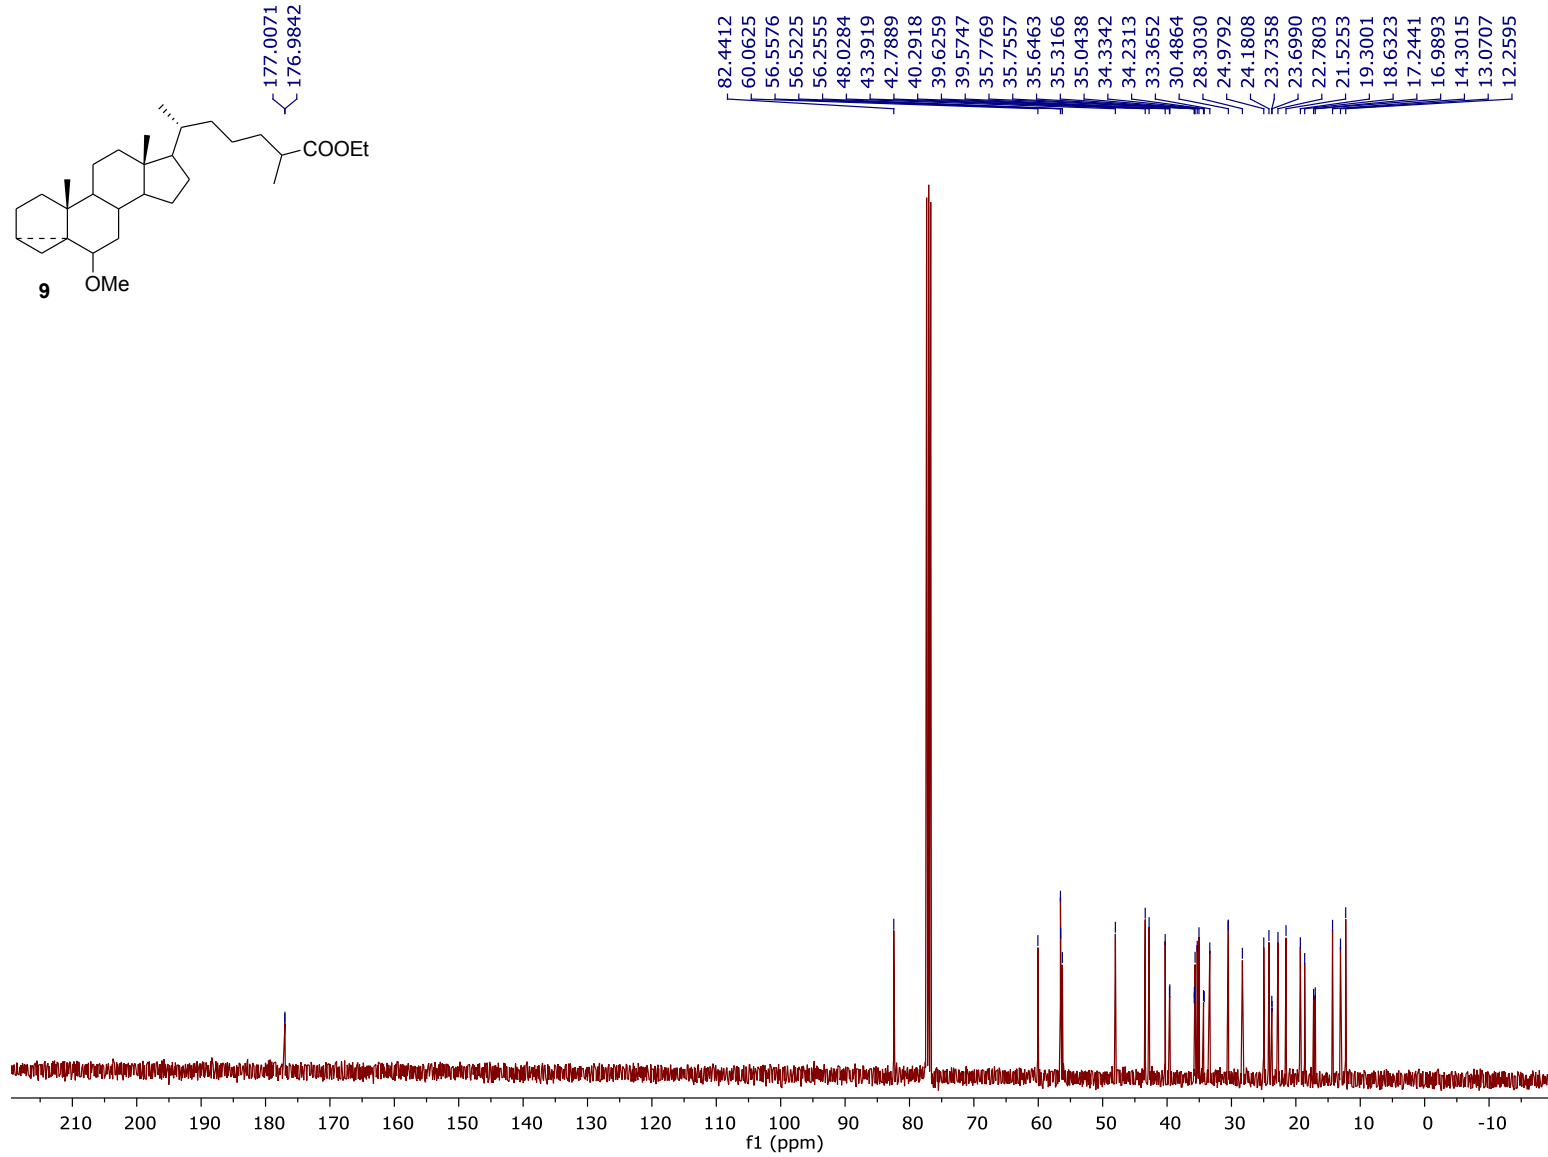

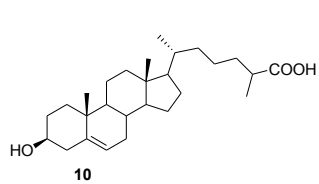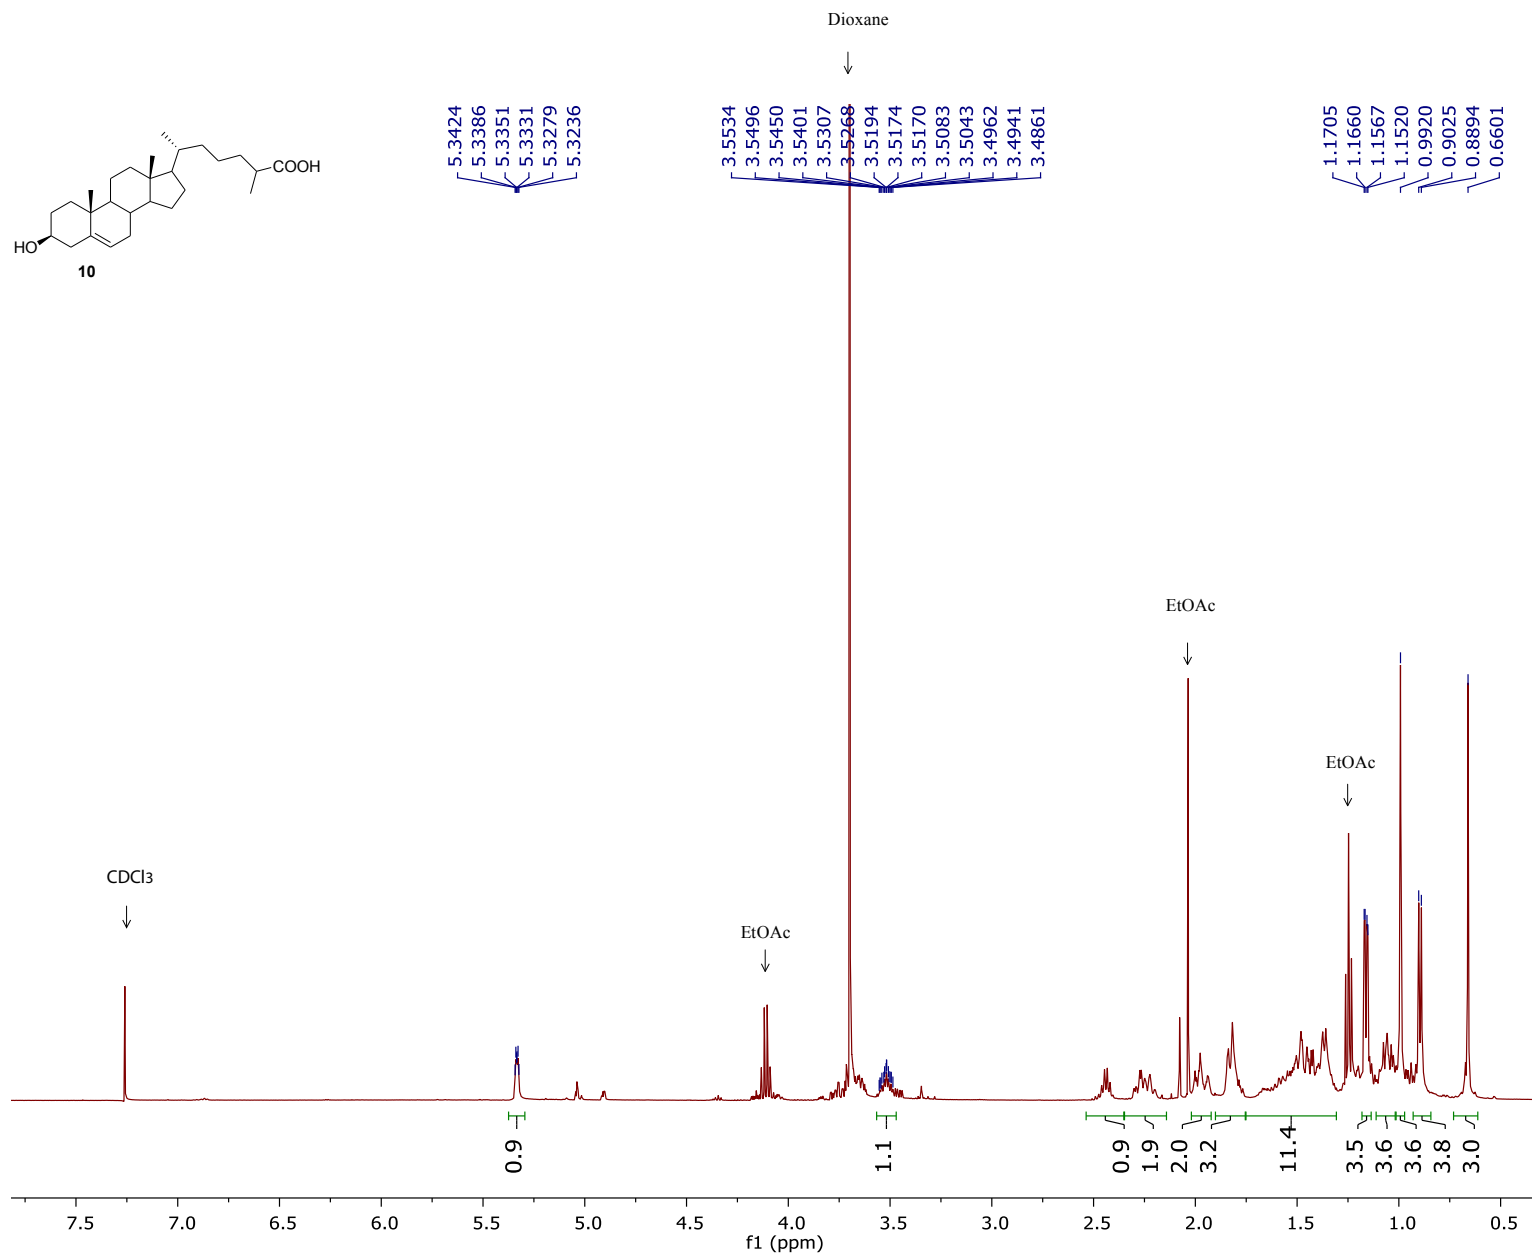



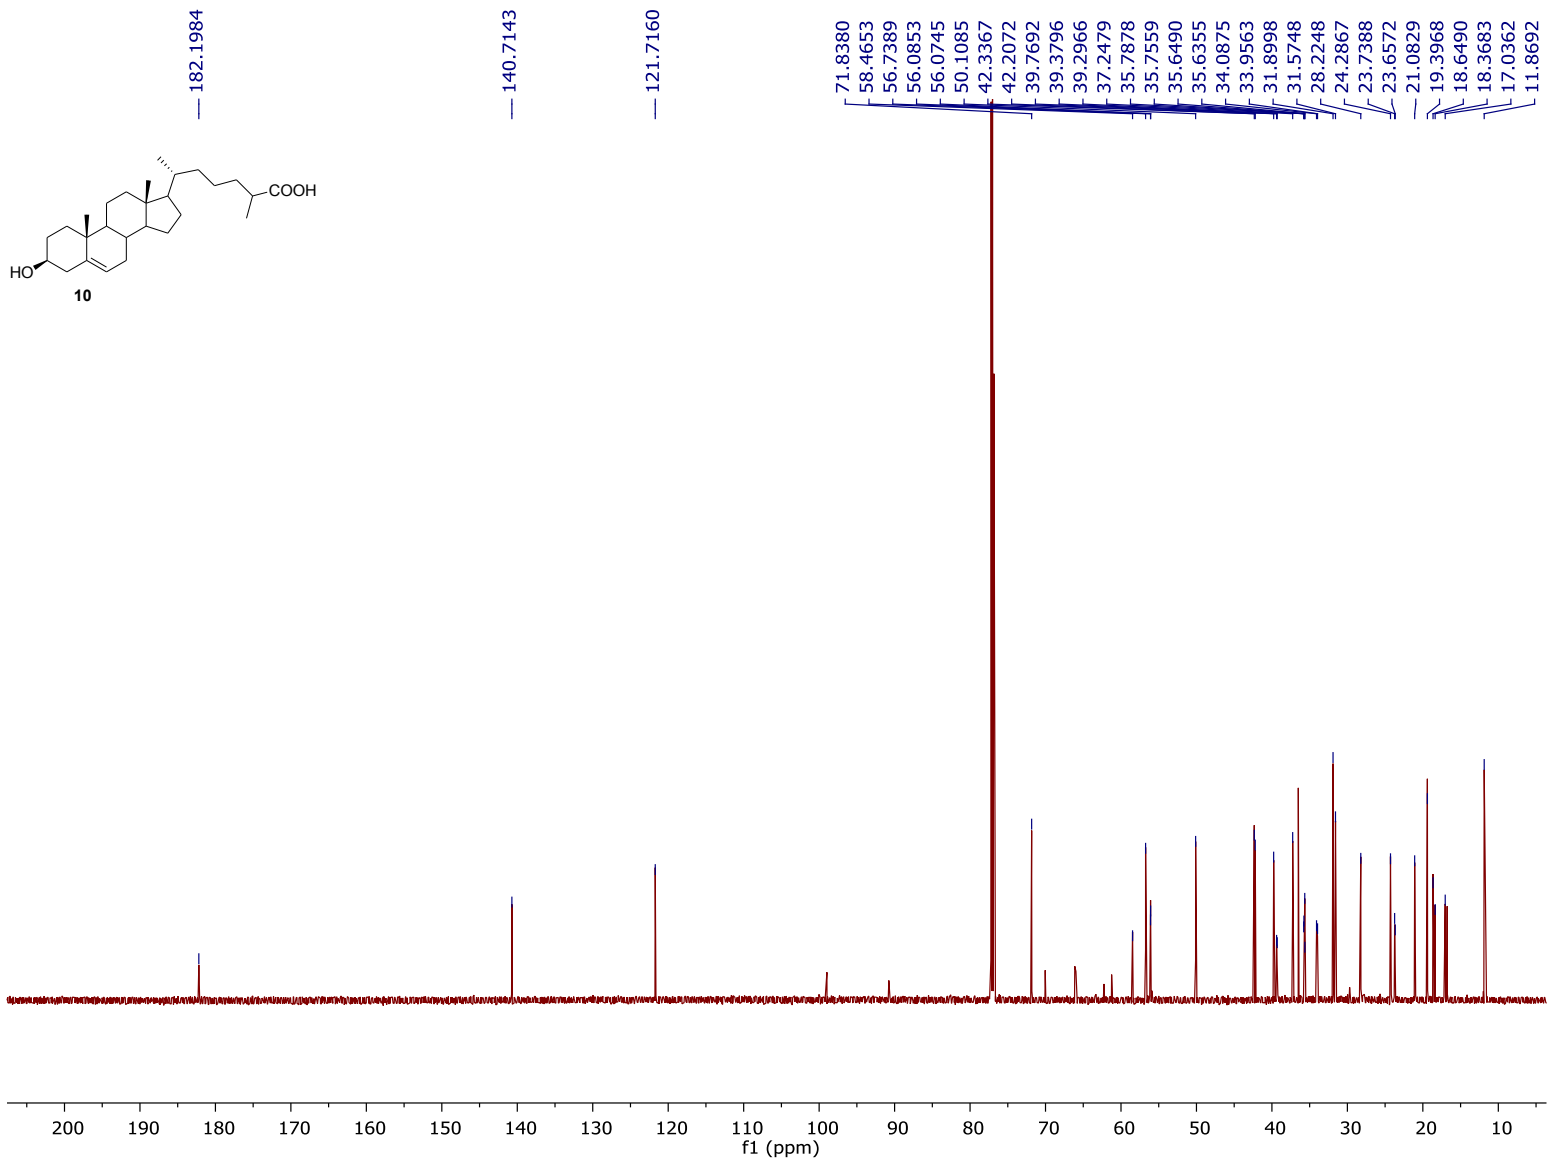

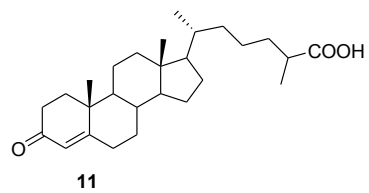

— 5.7257

1.1887  
1.1840  
1.1759  
0.9103  
0.8972  
0.7014

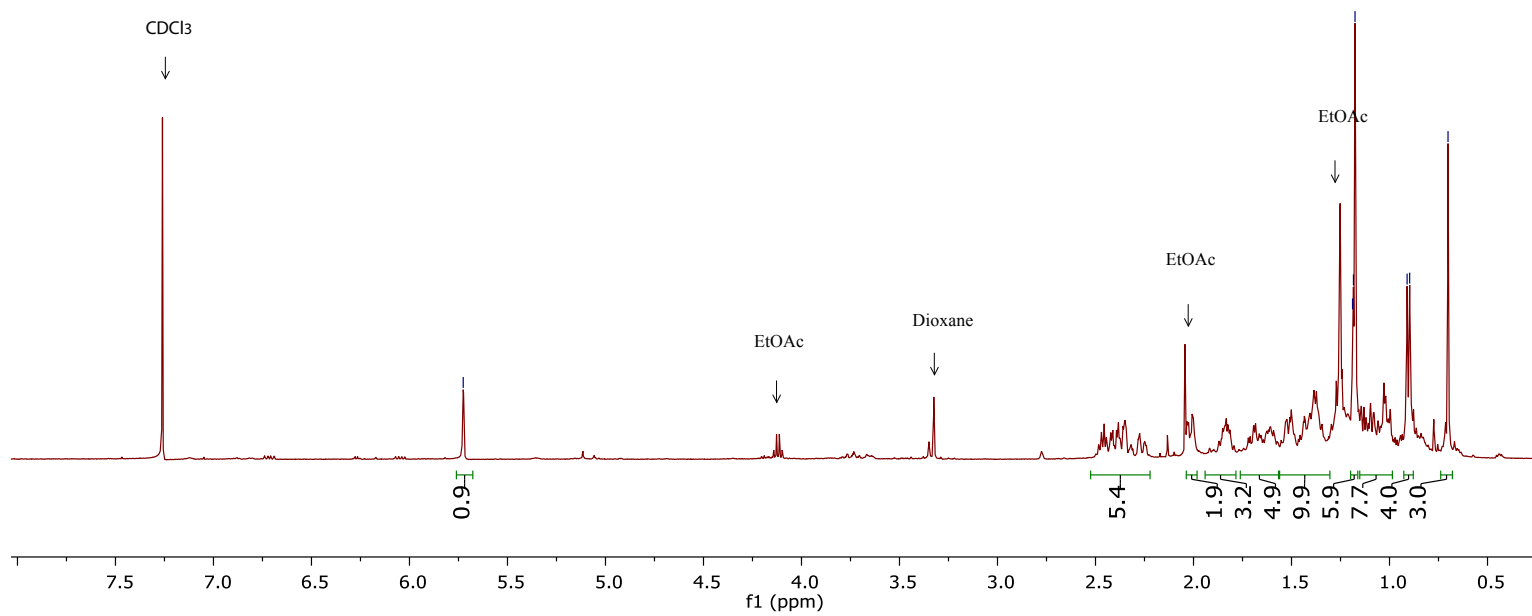

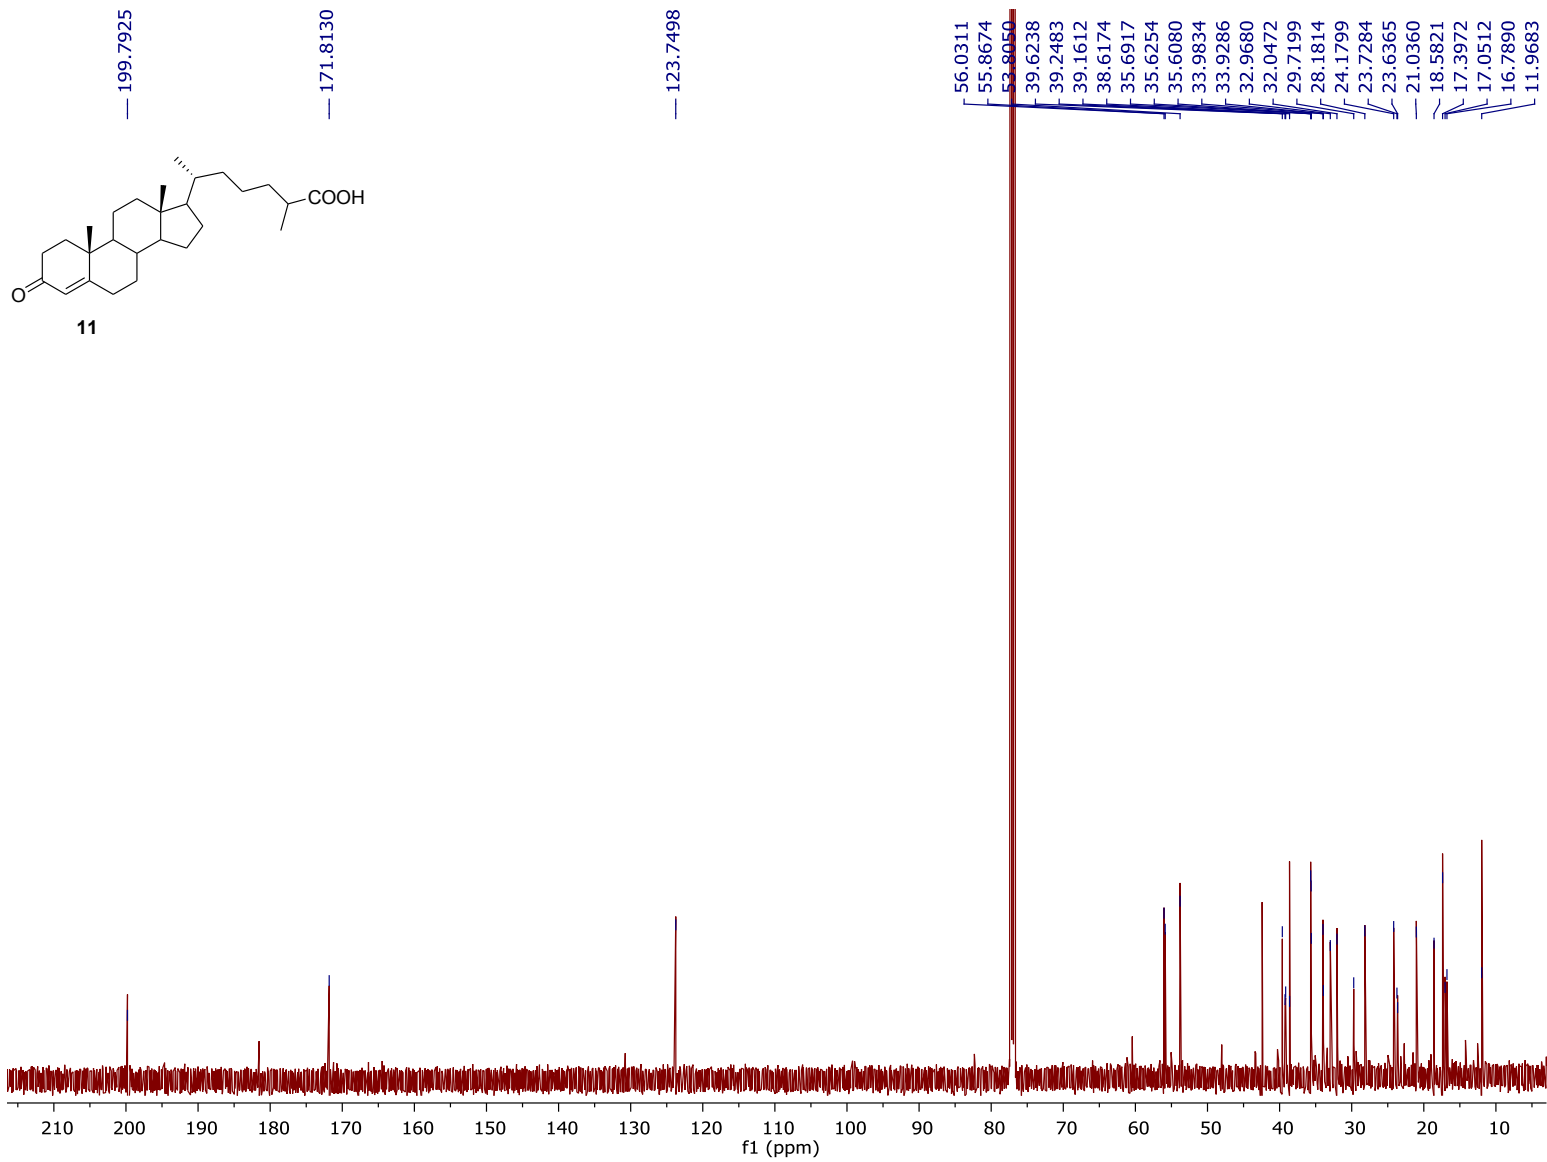

Supplement: id500033m_si_001.pdf [file id500033m_si_001.pdf]
